# Supplementary material for: Culture media composition influences patient-derived organoid ability to predict therapeutic responses in gastrointestinal cancers
Source: PubMed Central journal article supplement (PMC9746806; doi:10.1172/jci.insight.158060), 2022-11-22
Supplement: jciinsight-7-158060-s064.pdf [file jciinsight-7-158060-s064.pdf]

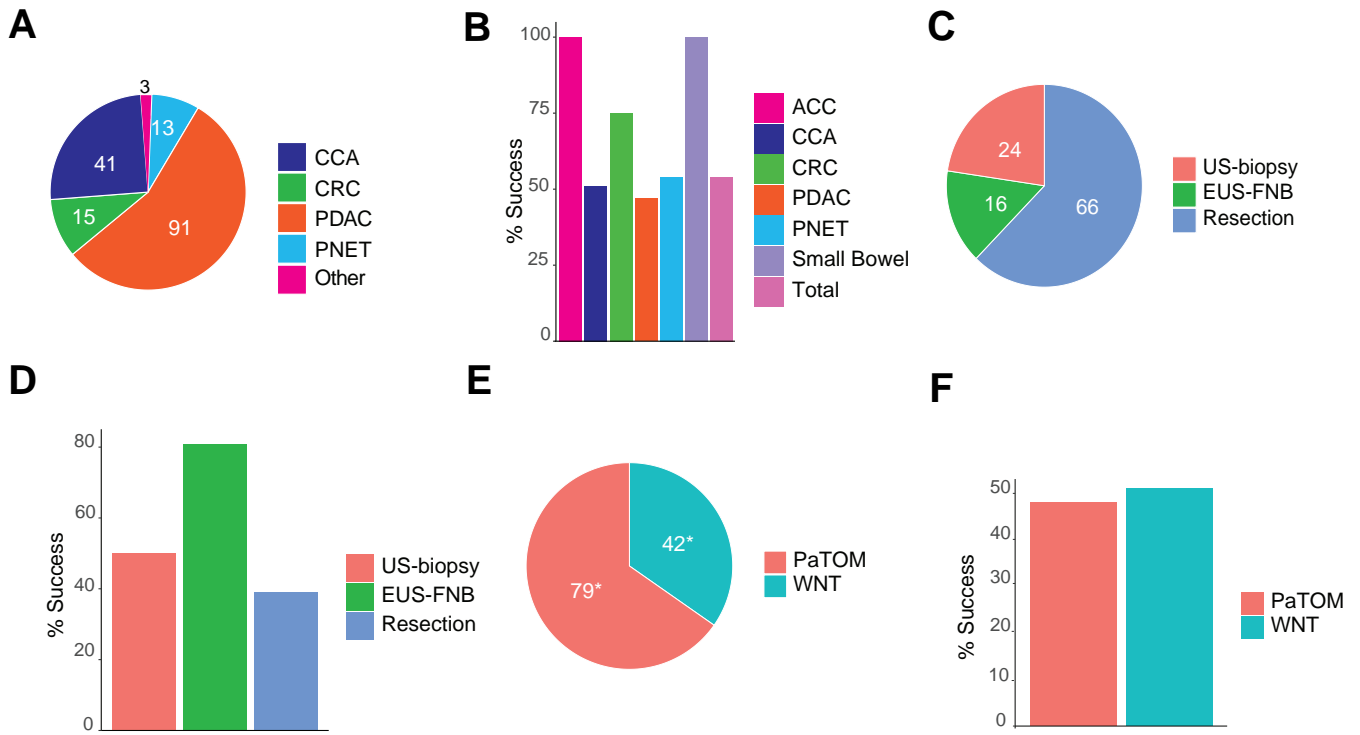

**Supplemental Figure 1. Overview of specimen type and success rates for PDO formation from GI cancers.** (A) Pie chart indicating number of PDOs attempted for each GI cancer type. Other = 2 ACC, 1 small bowel cancer; N = 163. (B) Bar graph indicating success rates for PDO formation per GI cancer type. (C) Pie chart indicating the number of pancreatic cancer specimens (ACC, PDAC, PNET) derived from US-biopsy, EUS-FNB, or surgical resection; N = 106. (D) Bar graph indicating the success rates for PDO formation by specimen type for pancreatic cancer. (E) Pie chart indicating the number pancreatic cancer PDOs grown in either PaTOM or WNT media; N = 121. \*Fifteen organoids grown in both media. (F) Bar graph indicating the success rate for pancreatic cancer PDO formation by media type.

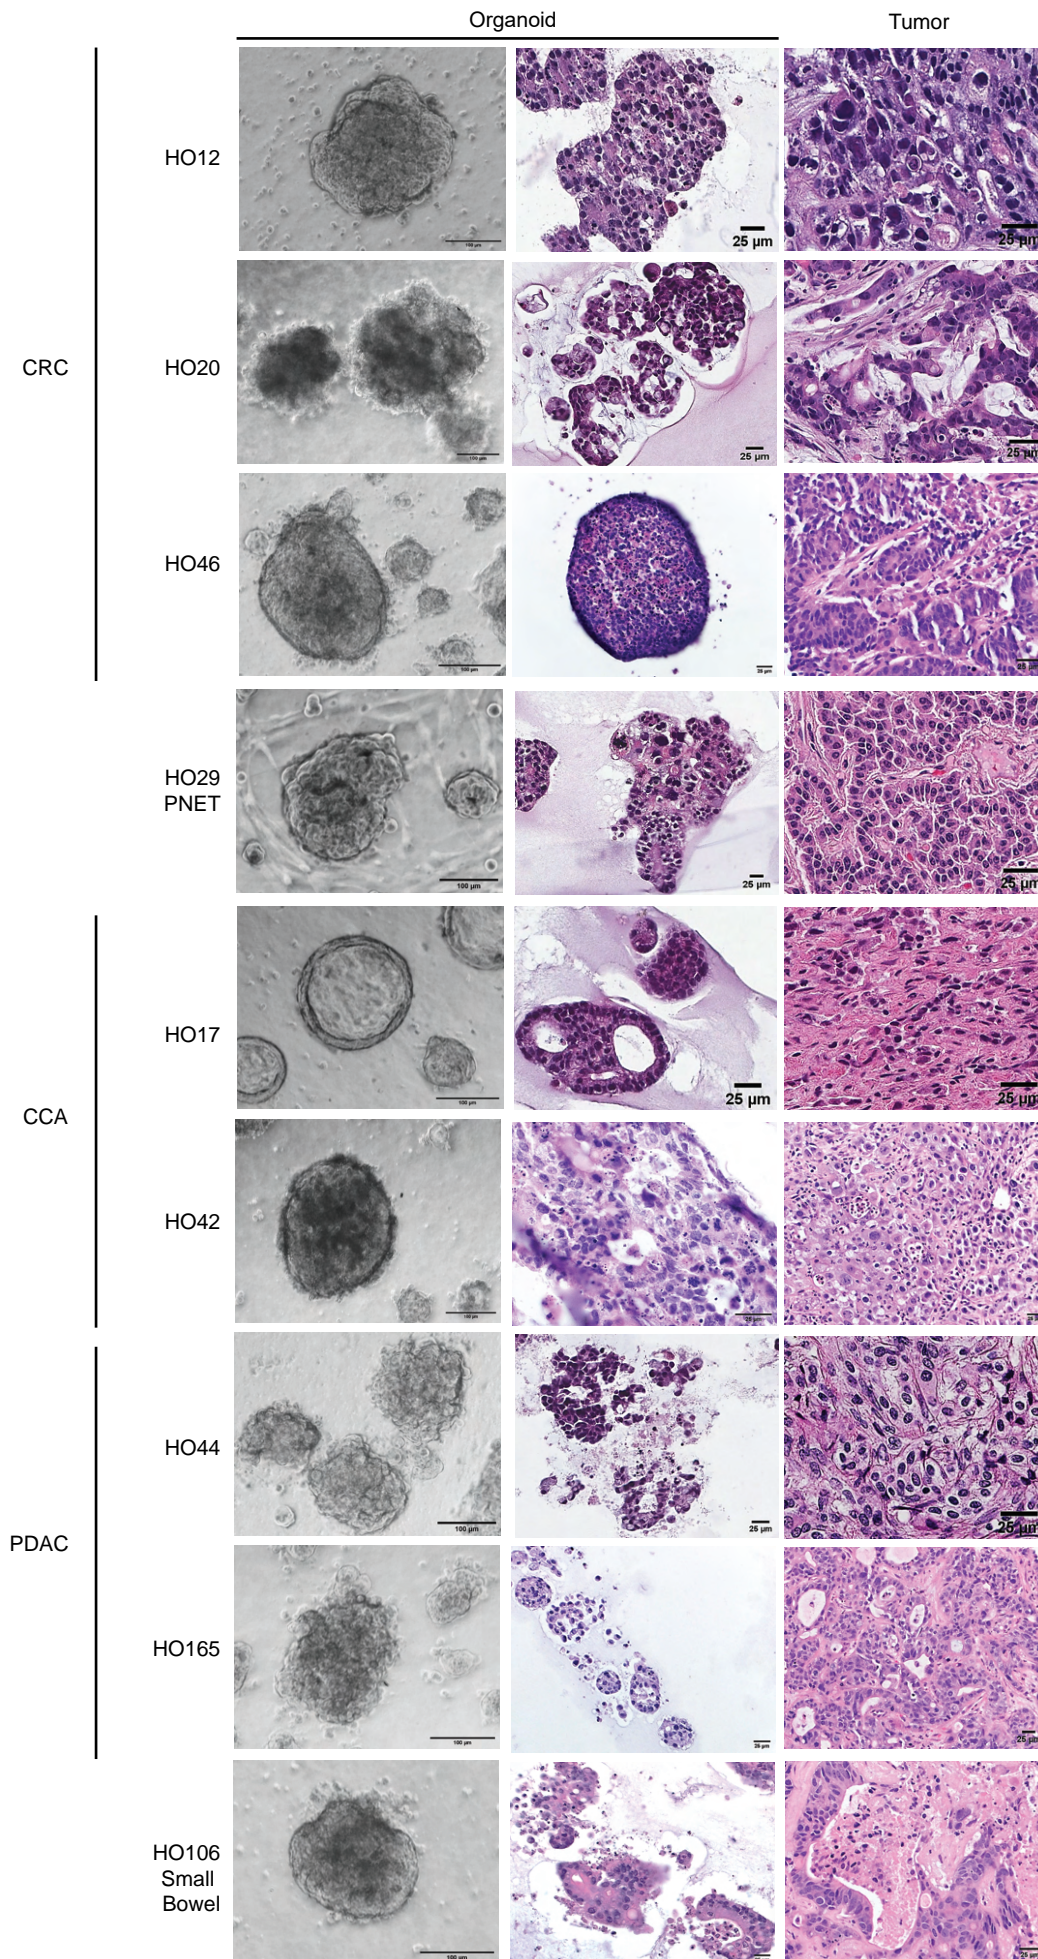

**Supplemental Figure 2. Histological and morphologic characterization of PDOs.** Organoid panels: Brightfield microscopy (scale bar = 100 µm) and H&E stains (scale bar = 25 µm). Tumor panels: H&E stains of corresponding donor tumor (scale bar = 25 µm); N = 9. Cancer type and PDO number shown next to the images.

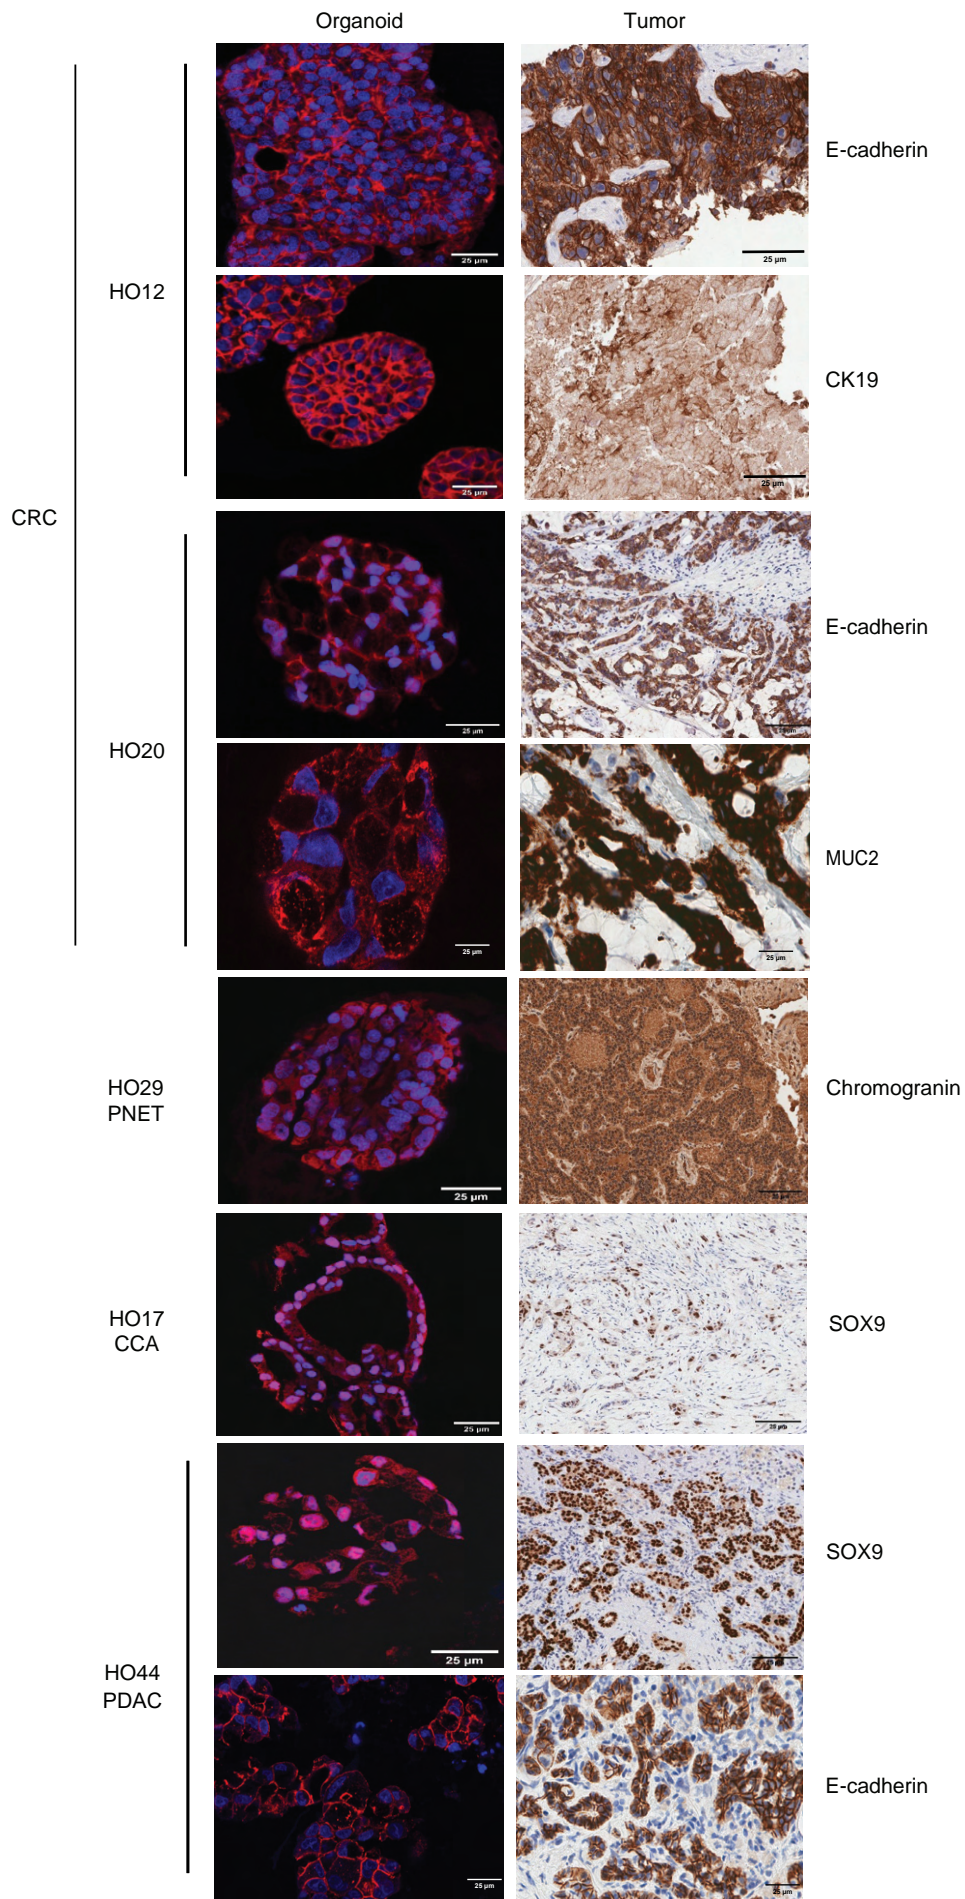

**Supplemental Figure 3. Immunohistological characterization of PDOs.** Organoid panels: Confocal immunofluorescence images of PDOs stained for common protein markers for each cancer type (scale bar = 25 μm). E-cadherin, CK19, MUC2, Chromogranin, and SOX9 shown in red and DAPI in blue. Tumor panels: Immunohistochemistry of corresponding donor tumors (scale bar = 25 μm); N = 5. Cancer type and PDO number shown next to the images.

**A**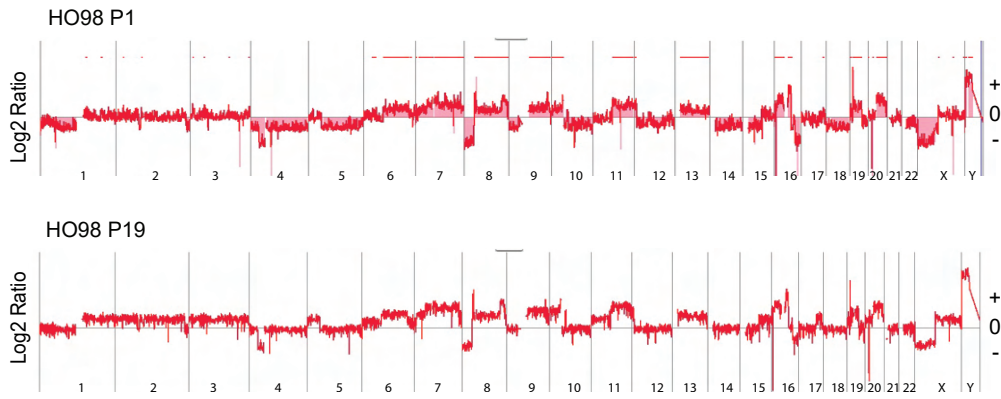**B**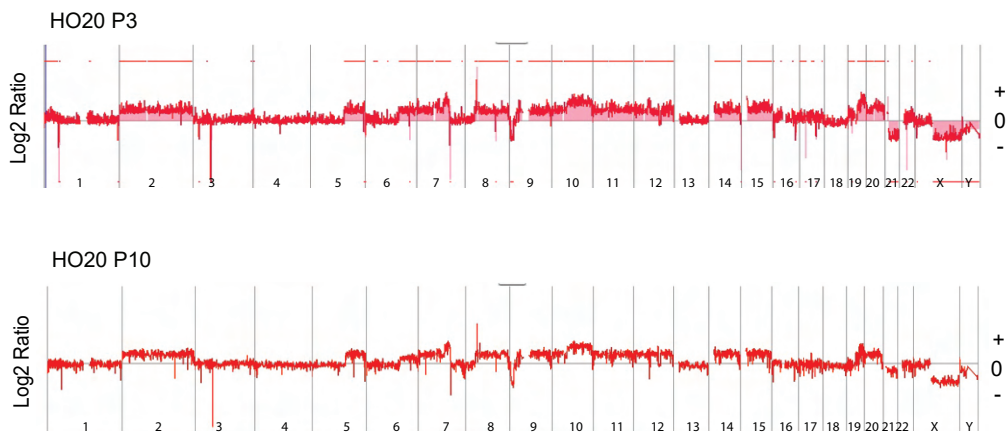**C**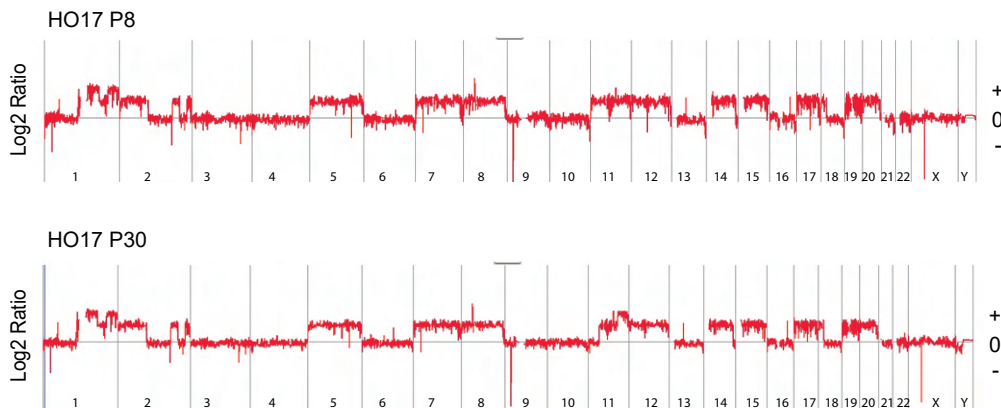

**Supplemental Figure 4. CNV Profiles of PDOs demonstrate chromosomal stability across multiple passages. (A) CRC PDO HO98 CNV Profile at Passage 1 and Passage 19. (B) CRC PDO HO20 CNV Profile at Passage 3 and Passage 10. (C) CCA PDO HO17 CNV Profile at Passage 8 and Passage 30. The x axis represents chromosome number and position and the y axis shows log2 ratios for each chromosome.**

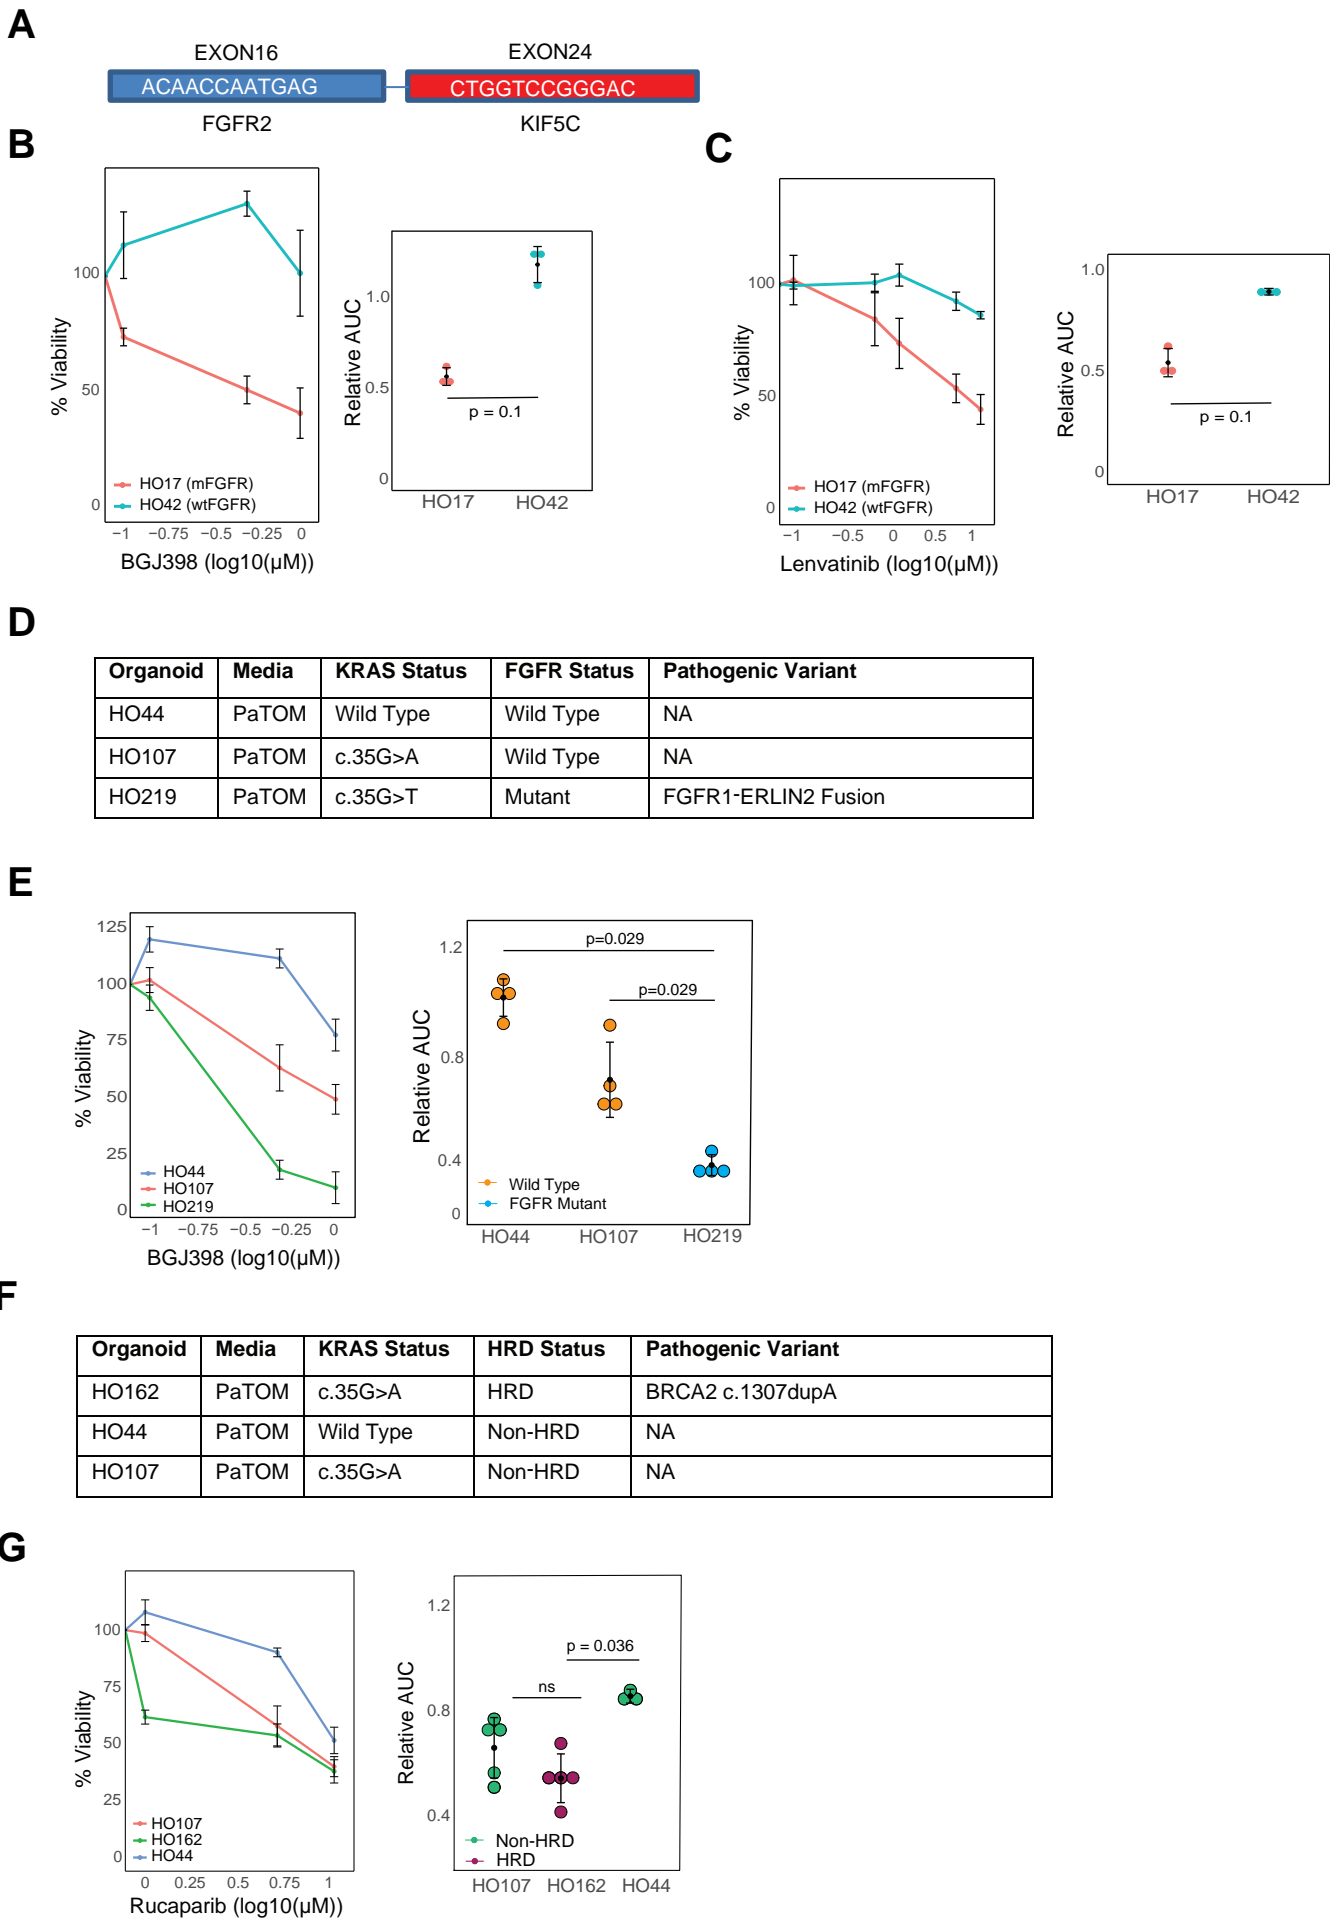

**Supplemental Figure 5. Mutational status in PDOs associated with sensitivity to cancer therapeutics.** (A) CCA PDO HO17 and donor tumor contains a FGFR2-KIF5C fusion. (B, C) Percent cell viability and relative AUC values in response to (B) BGJ398 and (C) Lenvatinib treatment for CCA PDO HO17 and wild type FGFR CCA PDO HO42; N = 2. (D) KRAS and FGFR mutation status of 3 PDAC PDOs grown in PaTOM media. (E) PDAC PDO percent cell viability and relative AUC values in response to BGJ398 in PaTOM media; N = 3. (F) KRAS and HRD mutation status of 3 PDAC PDOs in PaTOM media. (G) Percent cell viability and relative AUC values of PDAC PDOs in response to Rucaparib in PaTOM media; N = 3. p values indicate level of significance using Wilcoxon Rank Sum test between mutant and wild type PDOs.

**A**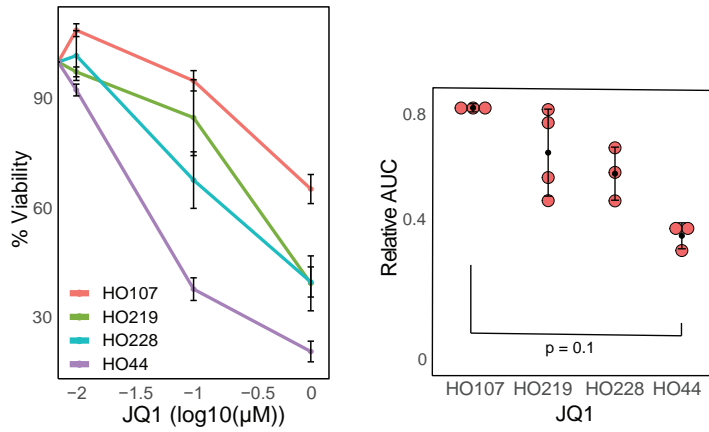**B**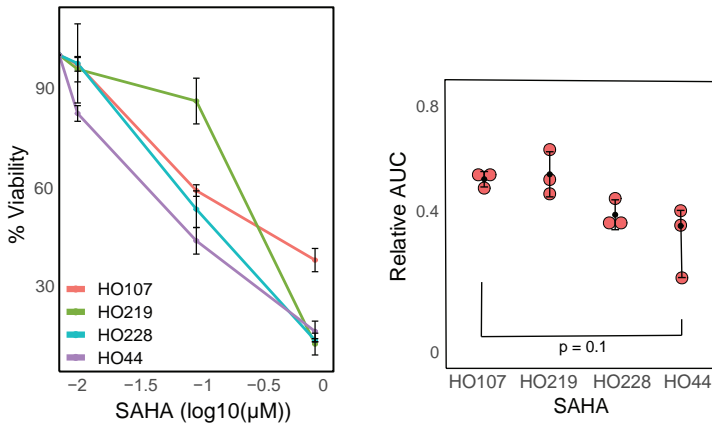**C**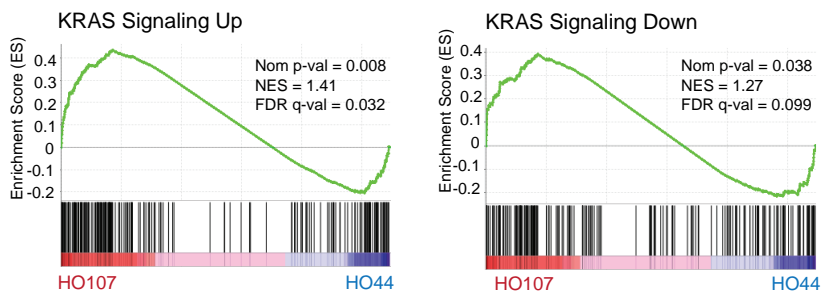**D**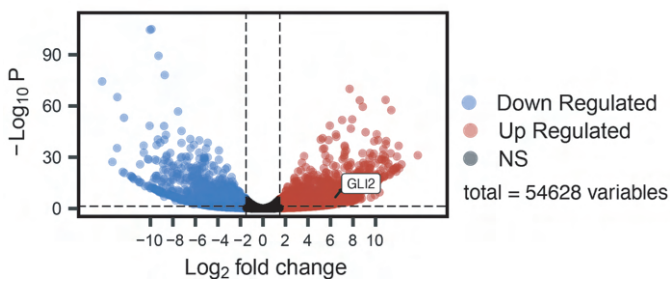**E**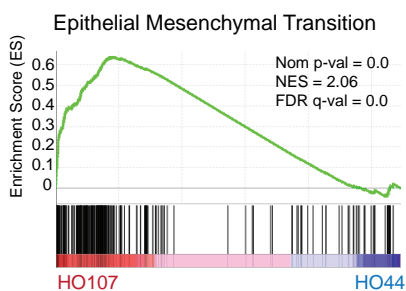

**Supplemental Figure 6. Pancreatic cancer PDOs transcriptomic signatures and drug response to epigenetic therapies.** (A) Percent cell viability and relative AUC values for PDAC PDOs in response to JQ1 in PaTOM media; N = 4. (B) Percent cell viability and relative AUC values for PDAC PDOs in response to SAHA in PaTOM media; N = 4. p values indicate levels of significance using Wilcoxon Rank Sum test between the AUCs of the most sensitive (HO44) and resistant (HO107) PDO. (C) Gene sets enriched in PDAC PDO HO107 using GSEA for Hallmark gene sets. (D) Volcano plot showing genes down-regulated and up-regulated in HO107 where base mean  $\geq 1$ ,  $\text{Padj} \leq 0.05$ , and  $|\text{FC}| > 2$ . (E) Gene set enriched in HO107 using GSEA for Hallmark gene sets.

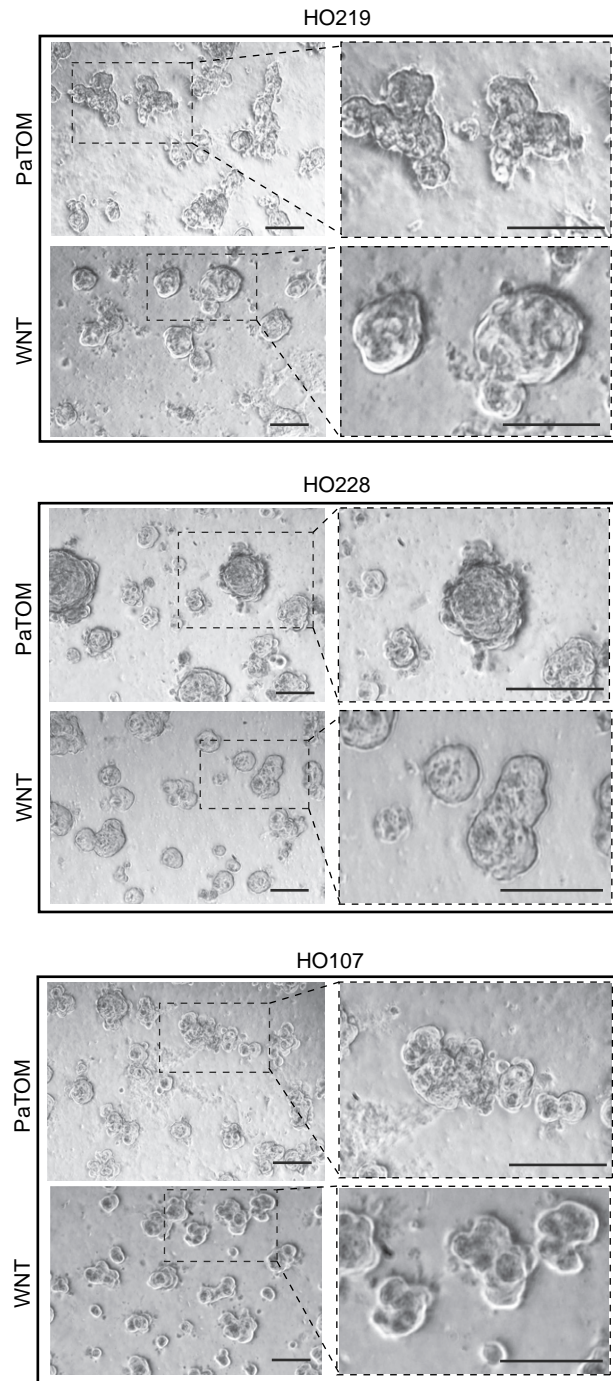

**Supplemental Figure 7. Morphology of PDAC PDOs in WNT and PaTOM media.** Brightfield imaging of PDAC PDOs grown in WNT and PaTOM media at two magnifications (scale bars = 100  $\mu\text{m}$ ); N = 3.

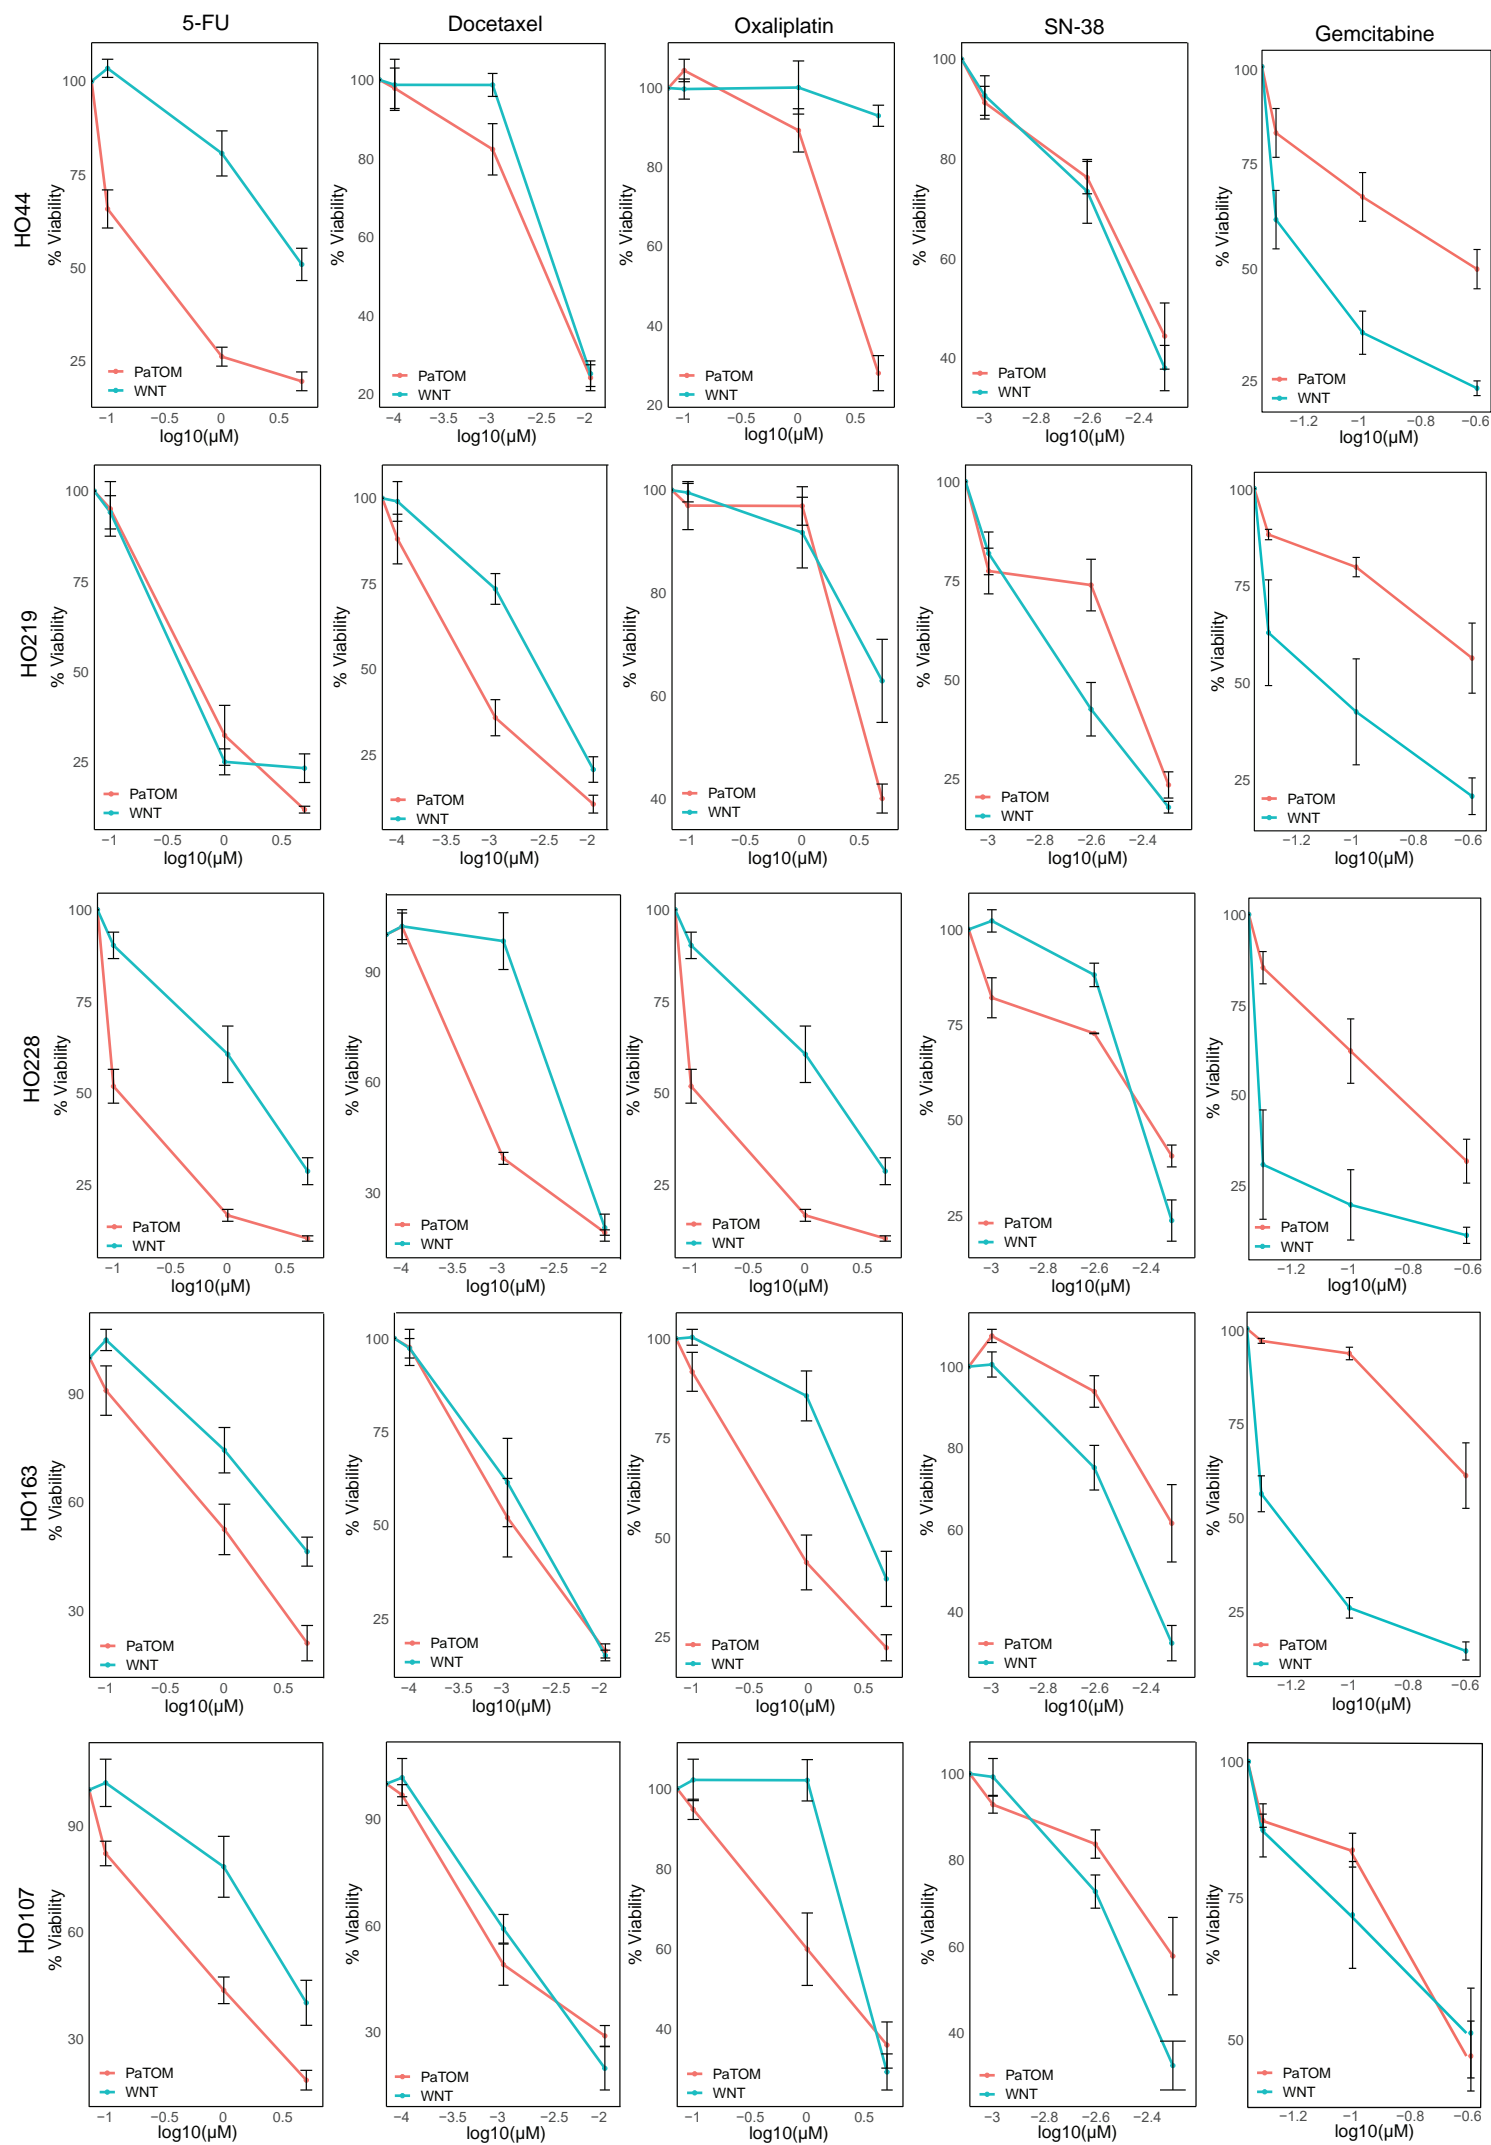



**Supplemental Figure 8. PDAC PDO drug response to chemotherapies in PaTOM and WNT media.** Percent cell viability for PDAC PDOs grown in PaTOM (red) and WNT (blue) media after treatment with chemotherapy including 5-FU, Docetaxel, Oxaliplatin, SN-38, and Gemcitabine; N = 5.

**A**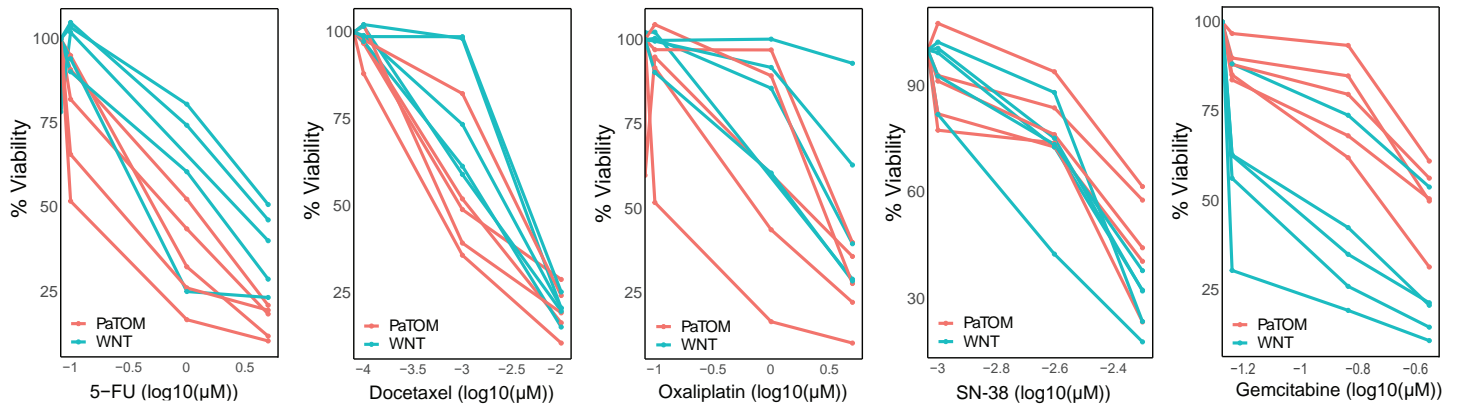**B**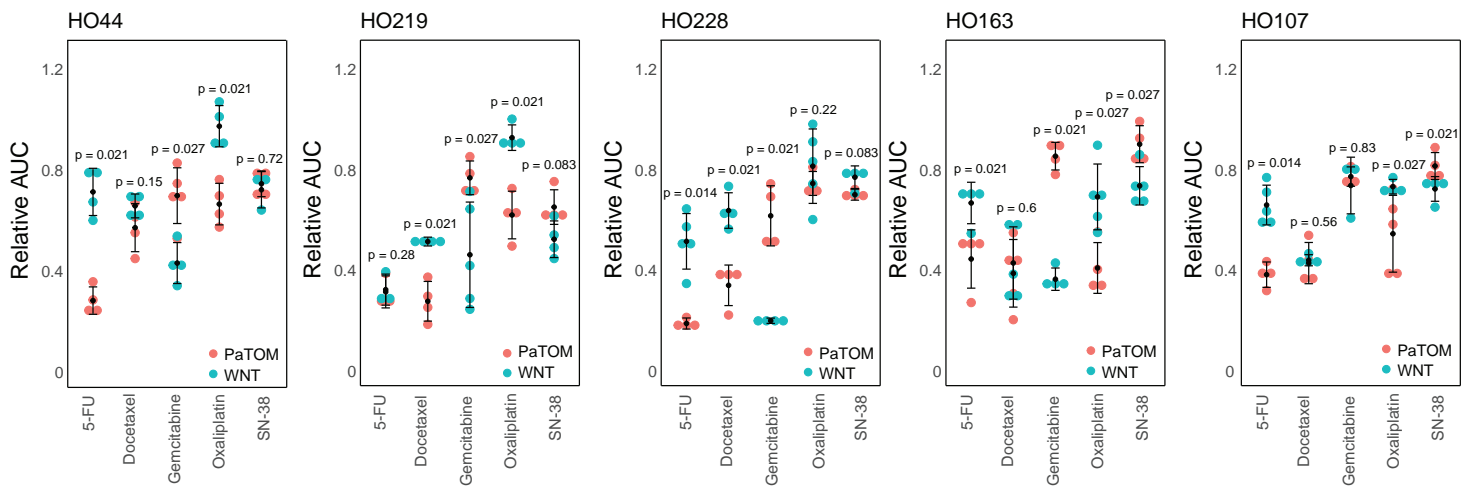

**Supplemental Figure 9. Summary of PDAC PDOs drug response to chemotherapies in PaTOM and WNT media.**

(A) Comparison of percent cell viability for PDAC PDOs grown in PaTOM (red) and WNT (blue) media after treatment with chemotherapy including 5-FU, Docetaxel, Oxaliplatin, SN-38, and Gemcitabine; N = 10. (B) Summary of relative AUC for each PDAC PDO in WNT and PaTOM to 5-FU, Docetaxel, Oxaliplatin, SN-38, and Gemcitabine; N = 5. Each dot represents the relative AUC value for one replicate for each PDAC PDO derived from the viability line graphs in Supplementary Figure 8. p values indicate level of significance using Wilcoxon Rank Sum test between AUC of PDOs grown in PaTOM and WNT media.

**A**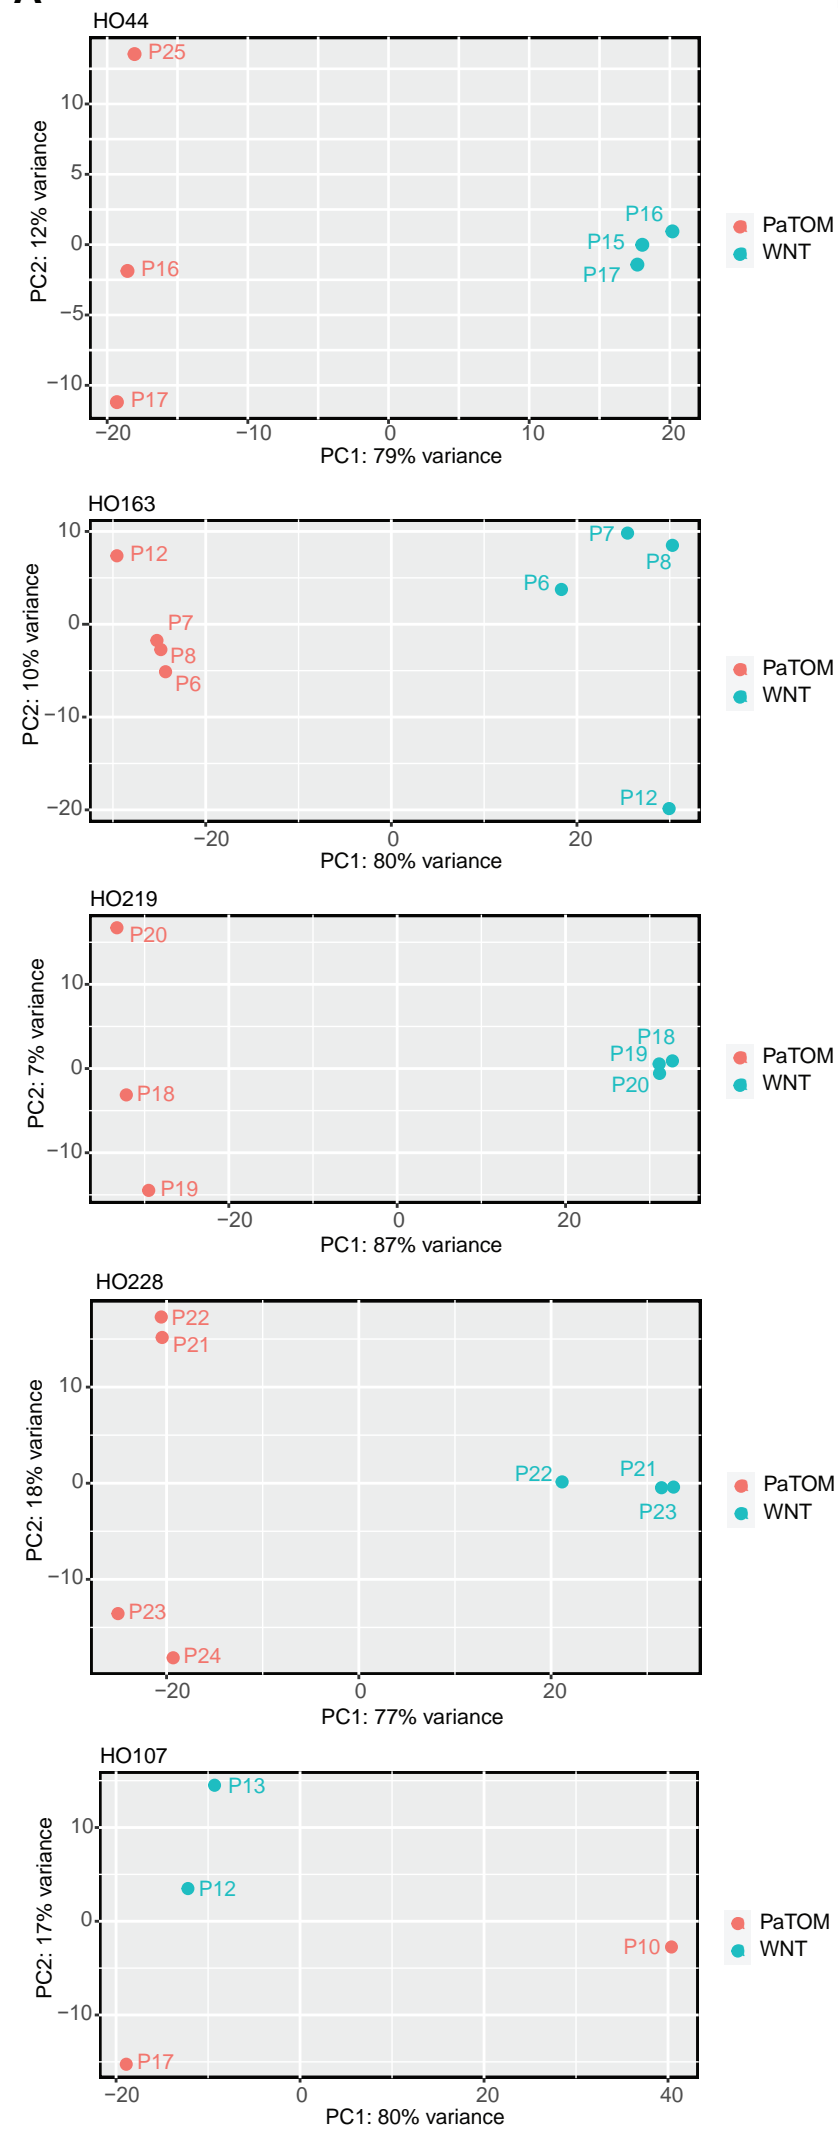**B**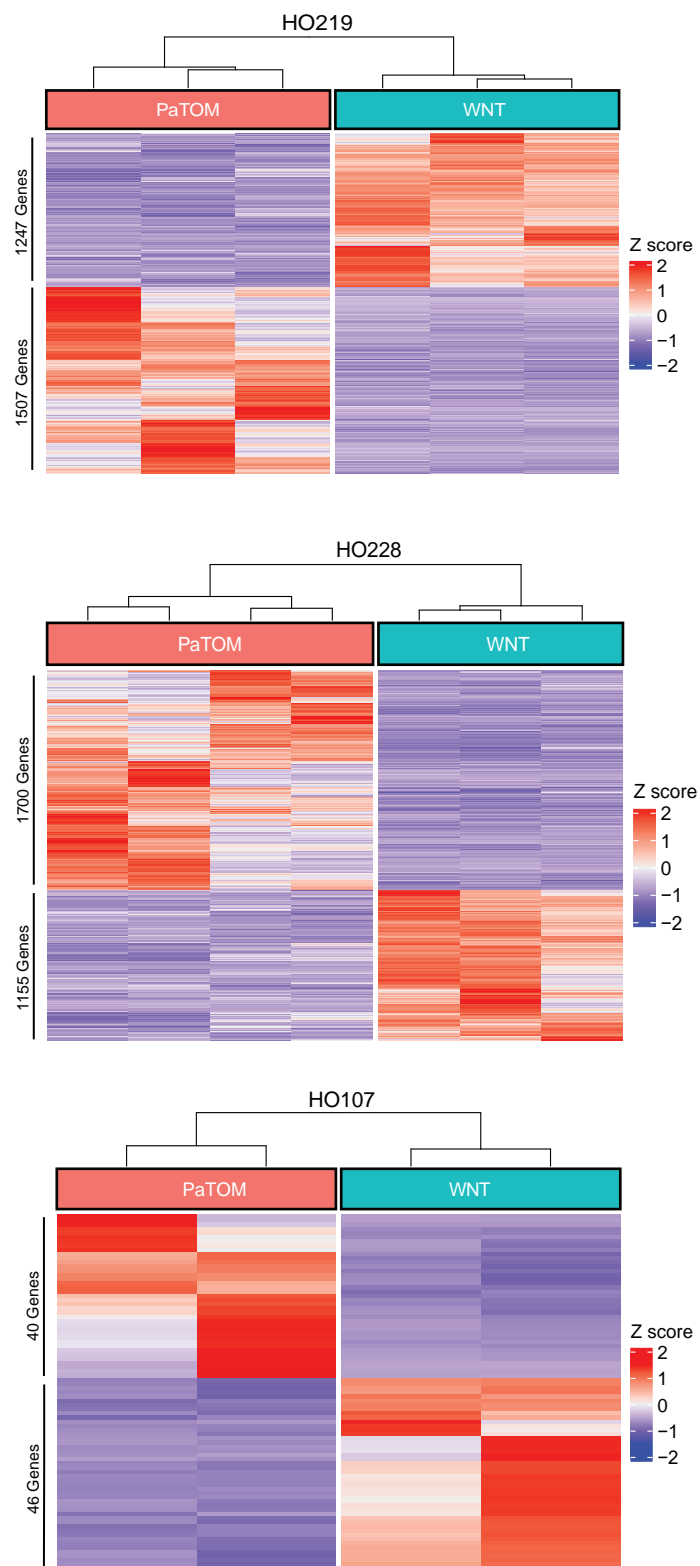

**Supplemental Figure 10. PDAC PDOs grown in two culture media show distinct transcriptomic signatures.** (A) PCA plot of PDAC PDOs in PaTOM and WNT media; N = 5. P=Passage number. (B) Heatmap showing clustering by differentially expressed genes for PDAC PDOs cultured in WNT and PaTOM media with a base mean  $\geq 1$ , Padj  $\leq 0.05$ , and  $|FC| > 2$ ; N = 3.

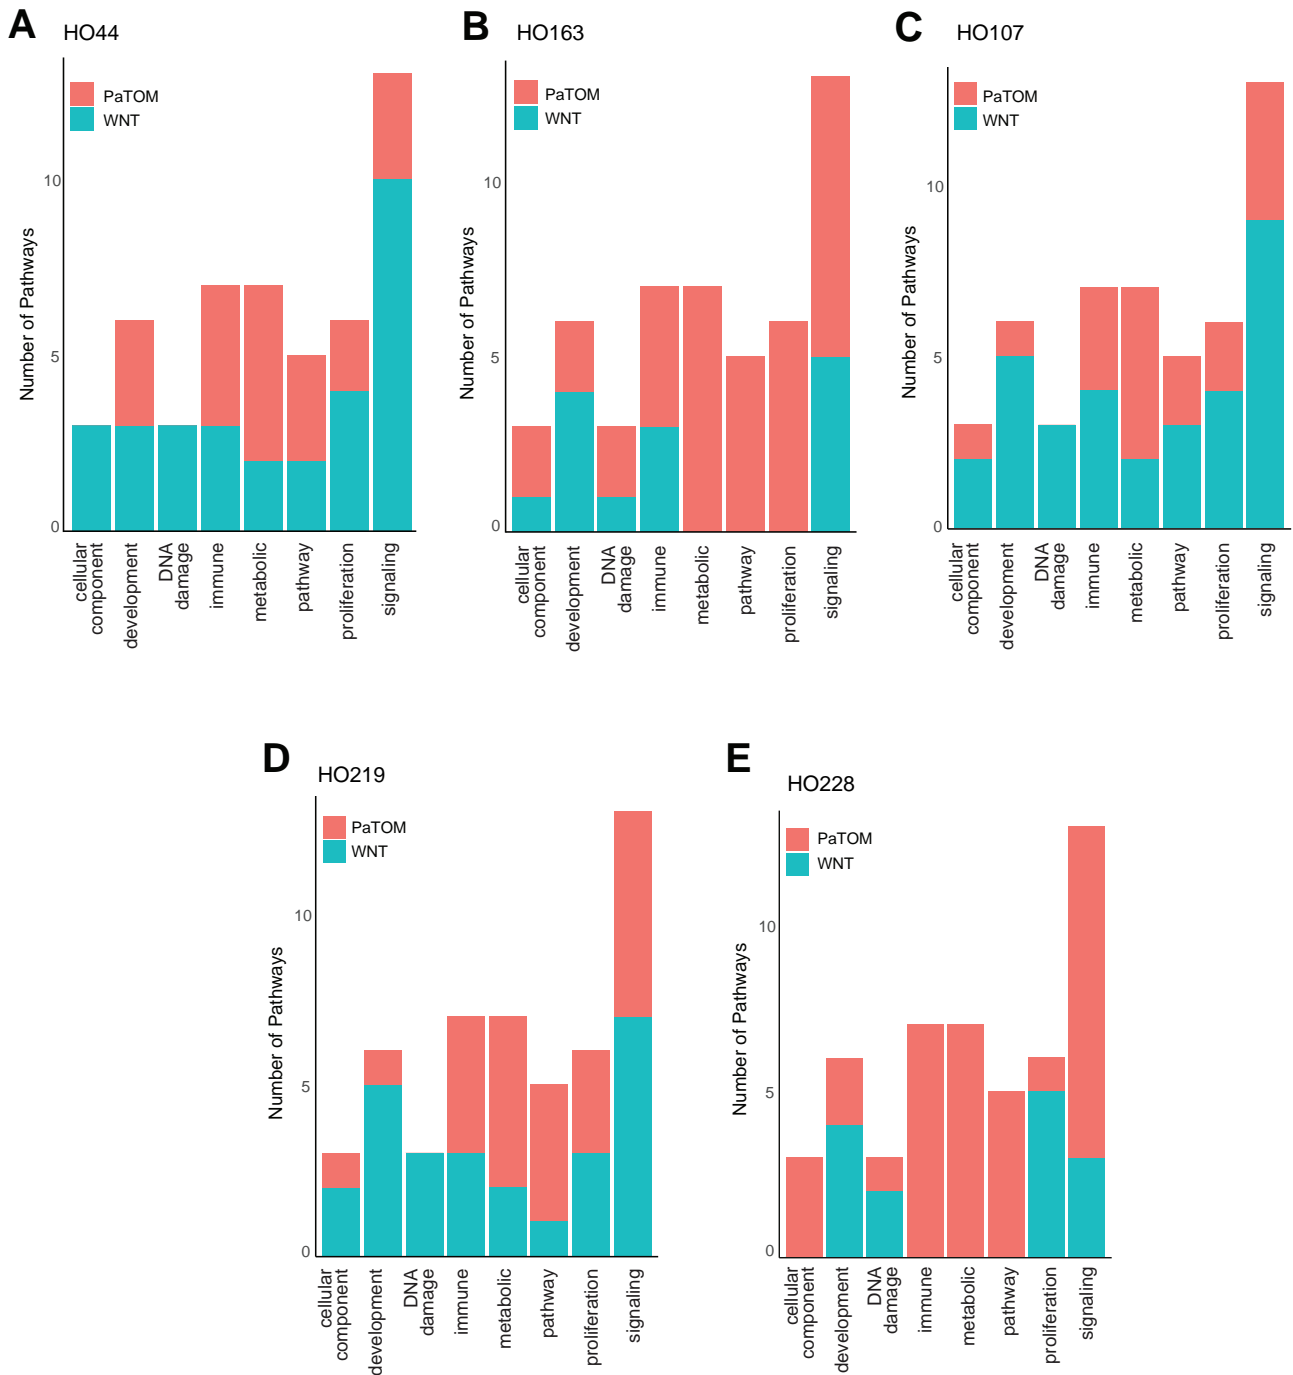

**Supplemental Figure 11. PDAC PDOs grown in two culture media show enrichment of different processes.**

Summary of enrichment for each process category defined by GSEA Hallmarks gene sets using RNA-seq expression data for PDAC PDOs (A) HO44, (B) HO163, (C) HO107, (D) HO219, and (E) HO228 in PaTOM and WNT media. All gene sets reported as enriched by GSEA in Supplemental Table 5 were included regardless of p value.

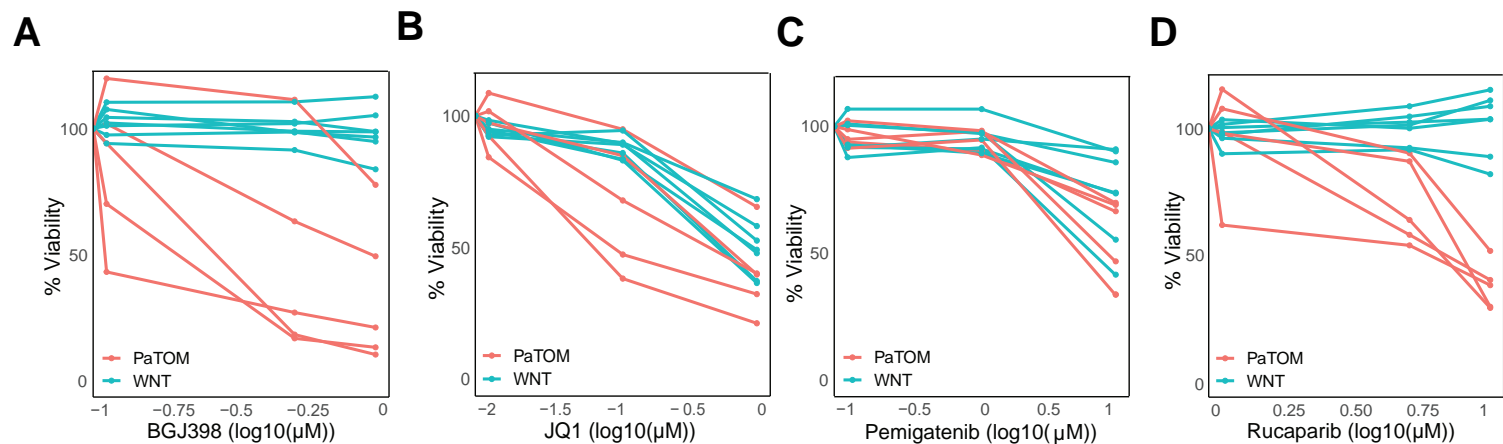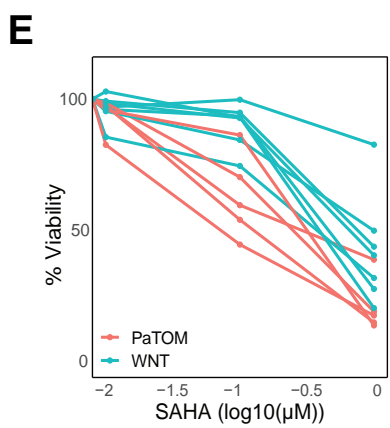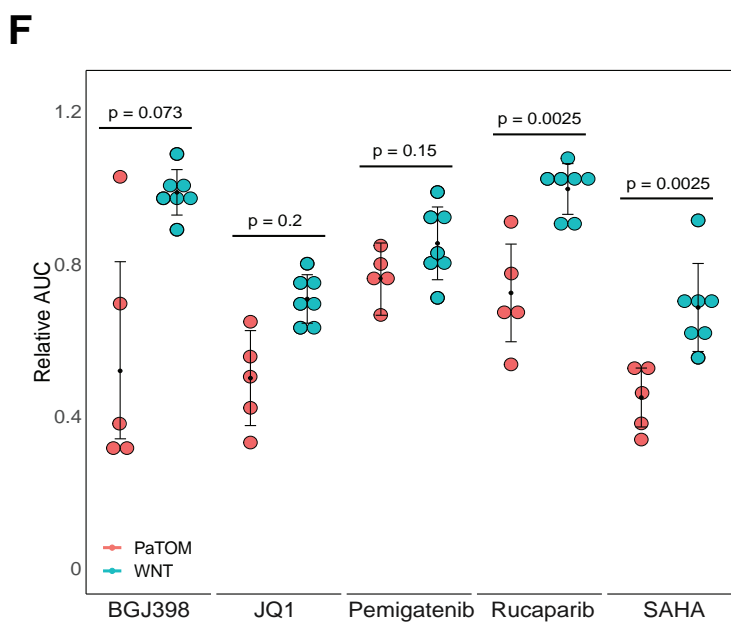

| Organoid | Media | KRAS Status | HRD Status | Pathogenic Variant              |
|----------|-------|-------------|------------|---------------------------------|
| HO133    | WNT   | Wild Type   | HRD        | BRCA1 c.1067A>G                 |
| HO159    | WNT   | c.35G>A     | HRD        | ATM c.5557G>A                   |
| HO161    | WNT   | c.34G>C     | HRD        | BRCA1 c.2722G>T; BRCA2 c.125A>G |
| HO165    | WNT   | c.183A>T    | HRD        | ATM c.3161C>G; ATM c.2572T>C    |
| HO145    | WNT   | c.35G>T     | Non-HRD    | NA                              |
| HO153    | WNT   | c.35G>T     | Non-HRD    | NA                              |
| HO160    | WNT   | c.35G>A     | Non-HRD    | NA                              |

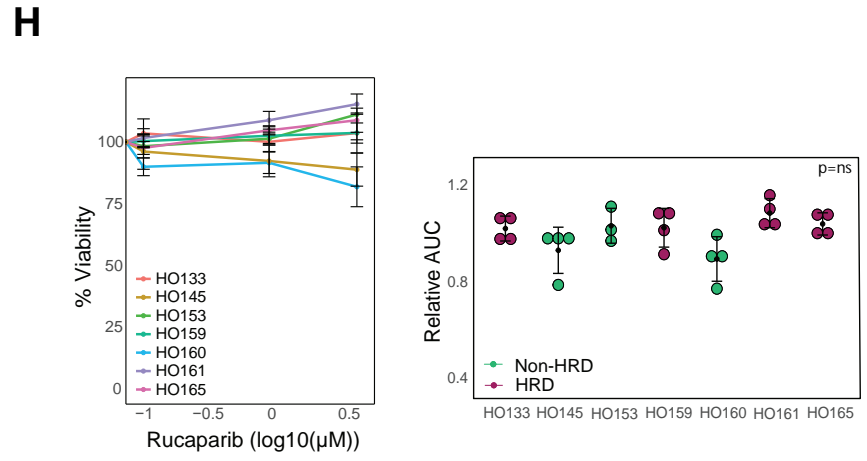

**Supplemental Figure 12. PDAC PDOs grown in WNT media are associated with a more resistant phenotype to targeted therapies.** (A-E) Percent cell viability for 5 PDAC PDOs grown in PaTOM (red) and 7 PDAC PDOs grown in WNT (blue) media after treatment with targeted therapy agents (A) BGJ398 (B) JQ1 (C) Pemigatenib (D) Rucaparib (E) SAHA; N = 12. (F) Relative AUC of PDAC PDOs in response to targeted therapies for 5 PDAC PDOs cultured in PaTOM and 7 PDOs cultured in WNT media; N = 12. Each dot represents the average relative AUC values for one PDAC PDO derived from the viability line graphs in A-E. p values indicate level of significance using Wilcoxon Rank Sum test between AUC of PDOs grown in PaTOM and WNT media. PaTOM BGJ398 and Rucaparib data extracted from Supplementary Figure 5. PaTOM JQ1 and SAHA data extracted from Supplementary Figure 6. (G) KRAS and HRD mutation status of PDAC PDOs in WNT media; N = 7. (H) Percent cell viability and relative AUC values of PDAC PDOs in response to Rucaparib in WNT media; N = 7. p values indicate level of significance using Kruskal-Wallis test between groups.

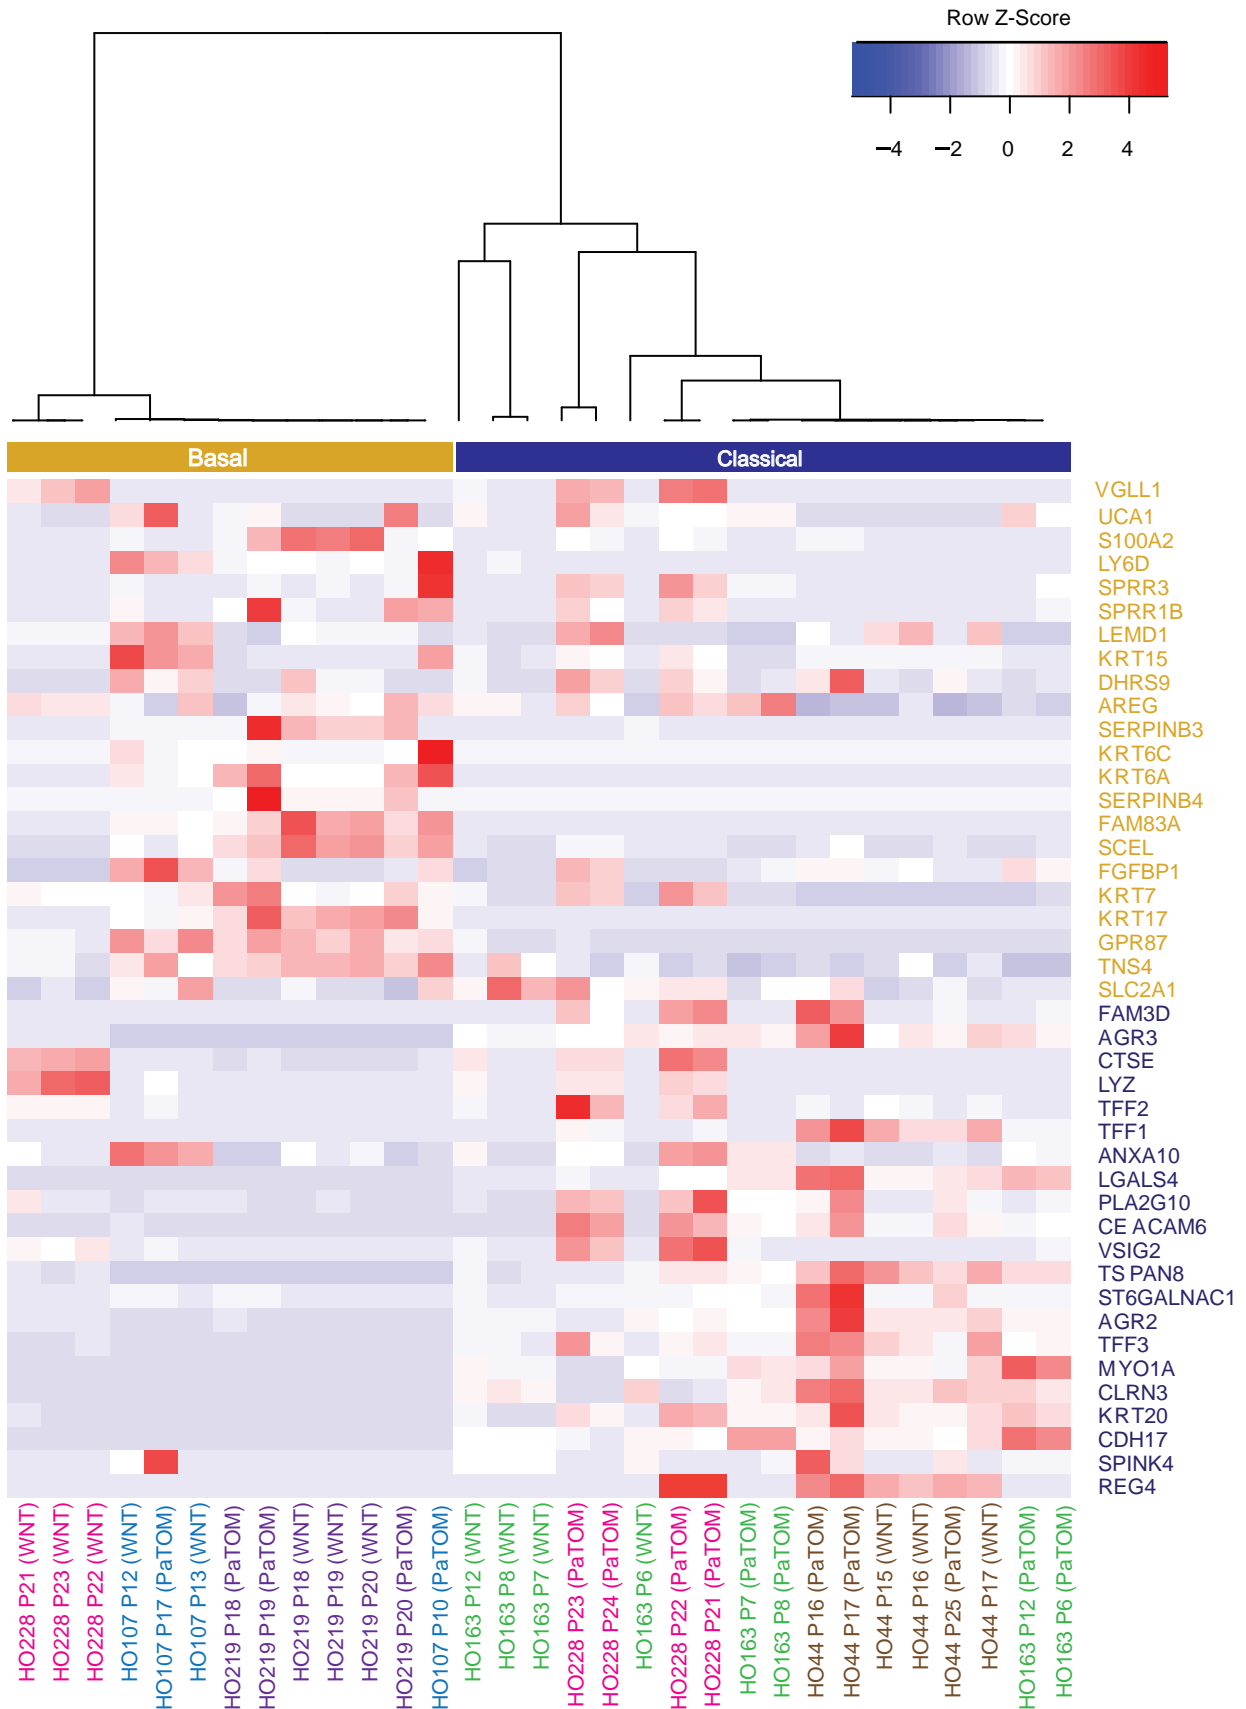

**Supplemental Figure 13. Transcriptomic subtyping of pancreatic cancer PDOs.** PDAC PDOs were categorized as classical or basal subtype by consensus clustering of RNA-seq z-scores for 5 PDAC PDOs in WNT and PaTOM media over multiple passages using the Moffit Gene Set. The genes in gold are associated with a basal gene signature and the genes in blue are associated with a classical gene signature. The organoid culture media in which each PDO was grown is listed in parenthesis. Each color represents all the samples associated with one PDO in PaTOM and WNT; N = 31. P = Passage number.

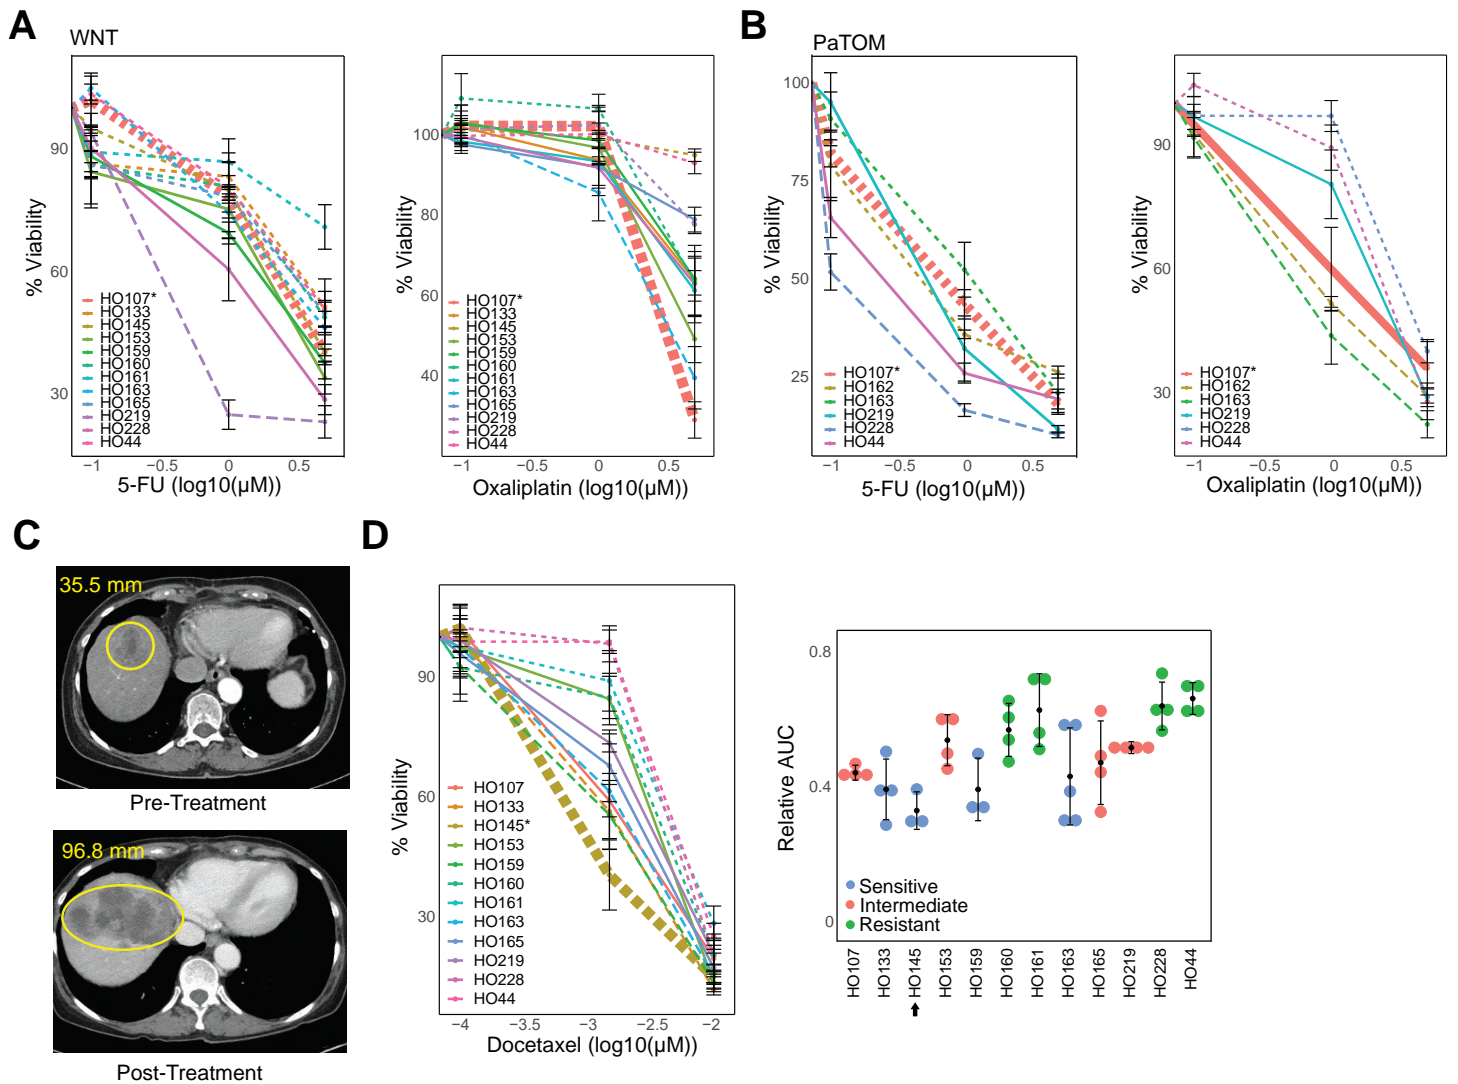

**Supplemental Figure 14. The effect of PDO culture media on clinical correlation.** (A) Percent cell viability for PDAC PDO HO107 and additional PDAC PDOs in response to 5-FU and Oxaliplatin in WNT; N = 12. (B) Percent cell viability for PDAC PDO HO107 and additional PDAC PDOs in response to 5-FU and Oxaliplatin in PaTOM; N = 6. (C) CT scans of donor patient for PDO HO145 pre- and post-treatment with PD showing the lesion increased from 35.5 mm to 96.8 mm. (D) Percent cell viability and relative AUC values in response to Docetaxel for PDAC PDO HO145 and additional PDAC PDOs grown in WNT media; N = 12. For line graphs, dashed lines indicate sensitive, solid lines indicate intermediate, dotted lines indicate resistant categorized using the Jenks Natural Breaks algorithm. The HO number with an asterisk and the thickest line in the line graphs indicates PDO response corresponding to the patient tumor response shown in the CT scan. The arrow next to the HO number in the relative AUC graph indicates the PDO corresponding to the donor tumor.



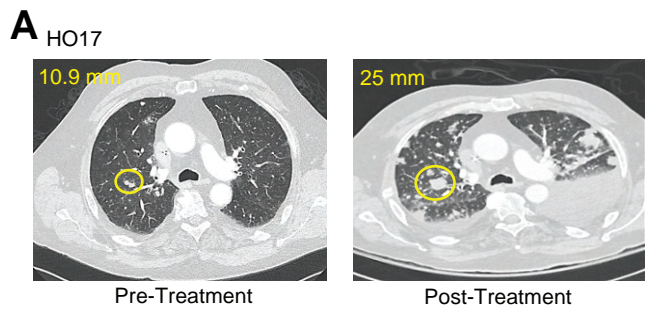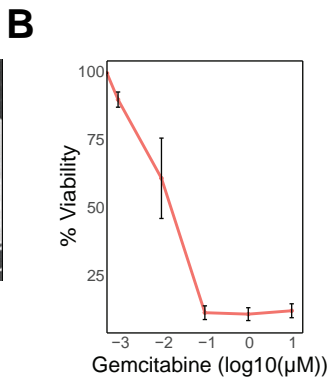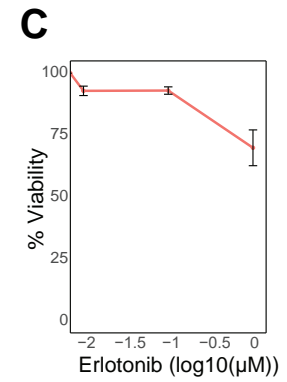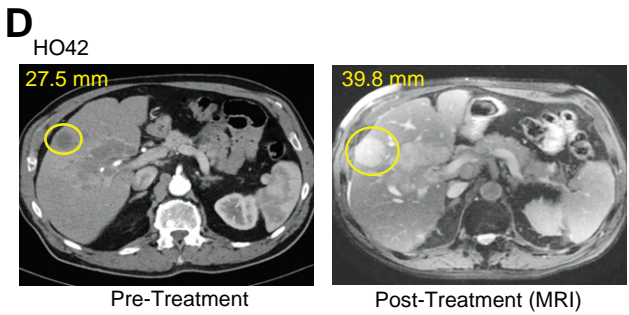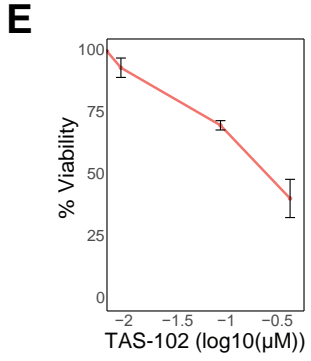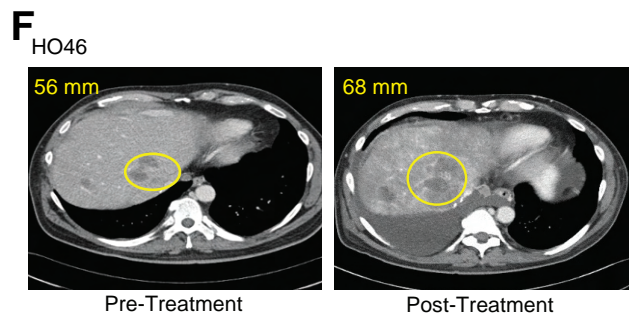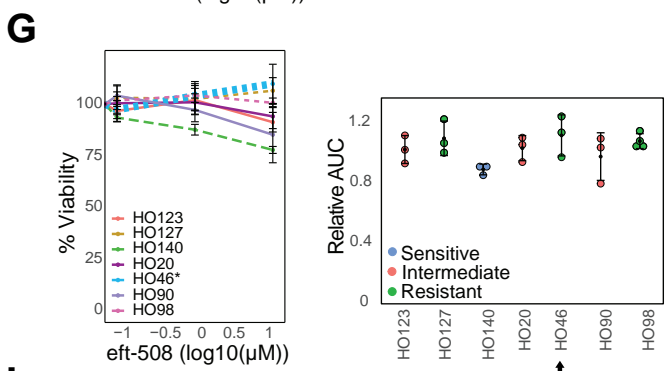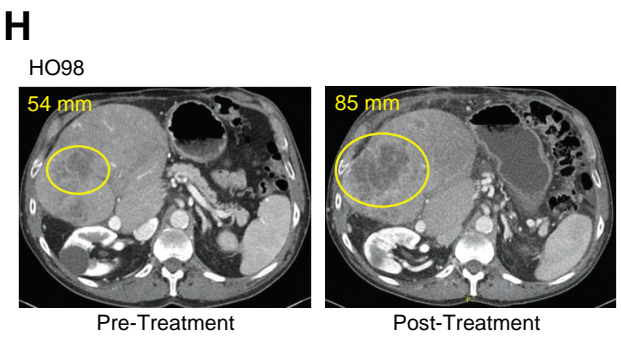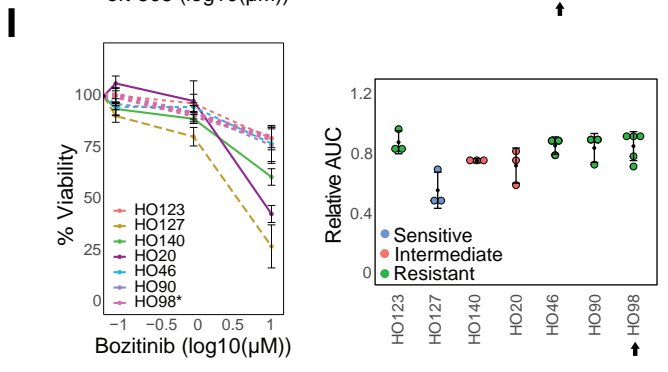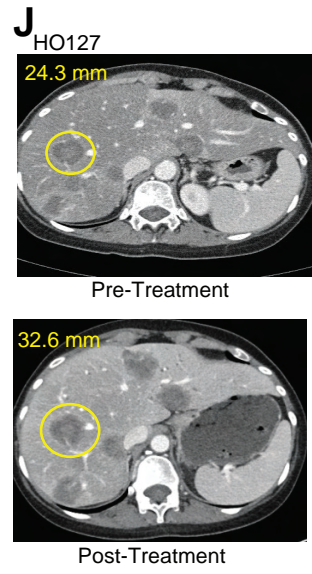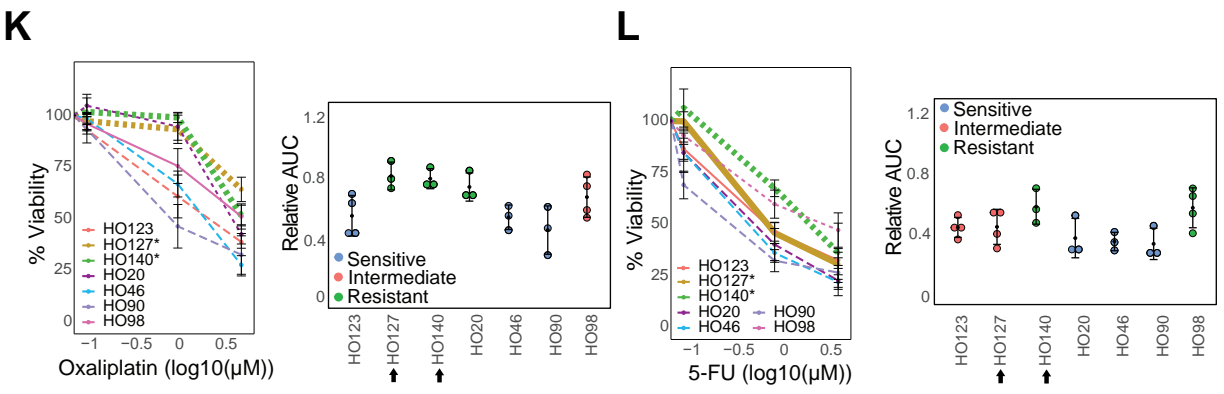

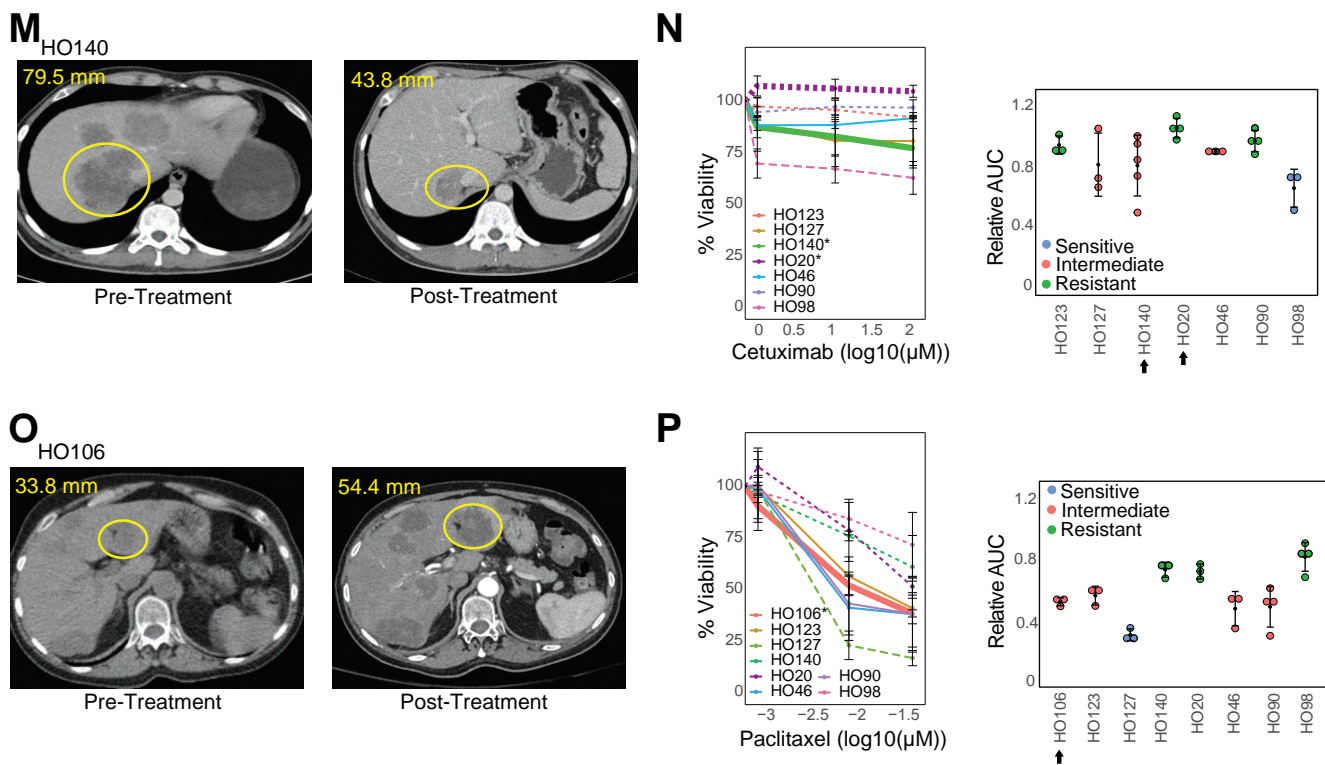

**Supplemental Figure 15. Donor patient CT scans and drug responses of corresponding PDOs.** (A) CT scans of donor patient pre- and post-treatment showing PD (HO17). (B, C) Percent cell viability for HO17 in response to (B) Gemcitabine and (C) Erlotinib. (D) Scans of donor patient pre-treatment (CT) and post-treatment (MRI) showing PD (HO42). (E) PDO HO42 percent cell viability in response to TAS-102. (F) CT scans of donor patient pre- and post-treatment showing PD (HO46). (G) Percent cell viability and relative AUC values in response to eft-508 for 7 CRC PDOs, including HO46. (H) CT scans of donor patient pre- and post-treatment showing PD (HO98). (I) Percent cell viability and relative AUC values in response to Bozitinib for 7 CRC PDOs, including HO98. (J) CT scans of donor patient pre- and post-treatment showing PD (HO127). (K, L) Percent cell viability and relative AUC values in response to (K) Oxaliplatin and (L) 5-FU for 7 CRC PDOs, including HO127. (M) CT scans of donor patient pre- and post-treatment showing PR (HO140). (N, K, L). Percent cell viability and relative AUC values in response to (K) Oxaliplatin, (L) 5-FU (L), and (N) Cetuximab for 7 CRC PDOs, including HO140. (O) CT scans of donor patient pre- and post-treatment showing PD (HO106). (P) Percent cell viability and relative AUC values in response to Paclitaxel for 8 PDOs, including HO106. For line graphs, dashed lines indicate sensitive, solid lines indicate intermediate, dotted lines indicate resistant PDOs categorized using Jenks Natural Breaks algorithm. The HO number with an asterisk and the thickest line in the line graphs indicates PDO response corresponding to the patient tumor response shown in the CT scan (some drug responses correspond to multiple patients). The arrow next to the HO number in the relative AUC graph indicates the PDO corresponding with the donor tumor.

| <b>Patient Data Table (n=163)</b> |           |
|-----------------------------------|-----------|
| <b>Age at Diagnosis</b>           |           |
| Mean                              | 65        |
| Range                             | 24-84     |
| <b>Sex</b>                        |           |
| Female                            | 73 (45%)  |
| Male                              | 90 (55%)  |
| <b>Diagnosis</b>                  |           |
| Cholangiocarcinoma                | 41 (25%)  |
| Pancreatic Cancer                 | 106 (65%) |
| Colorectal Cancer                 | 15 (9%)   |
| Small Bowel Cancer                | 1         |
| <b>Sample Location</b>            |           |
| Liver                             | 75 (46%)  |
| Pancreas                          | 82 (50%)  |
| Other*                            | 6 (4%)    |
| <b>Sample Type</b>                |           |
| Brush Biopsy                      | 2 (1%)    |
| EUS-guided FNB                    | 16 (10%)  |
| US-guided Biopsy                  | 79 (48%)  |
| Surgical Resection                | 66 (41%)  |

**Supplemental Table 1. Demographics for all patients in the study.** Summary of clinical information for patients included in the study for generating PDOs. \*Includes retroperitoneal lymph node, soft tissue in the abdomen, next to gastrojejunal anastomosis, peritoneal lesion, abdominal muscle, and lung.

| Organoid | Diagnosis | Age | Sex    | Race  | Initiation Date | Sample Type | Sample Location                       | Grew | Survived 1st Passage | Survived ≥ 3 Passages | Initiation Media | Reason For Failure       |
|----------|-----------|-----|--------|-------|-----------------|-------------|---------------------------------------|------|----------------------|-----------------------|------------------|--------------------------|
| HO1      | CCA       | 65  | Male   | White | 8/18/2017       | Brush       | Liver                                 | Y    | N                    | NA                    | PaTOM            | Bacterial Contamination  |
| HO2      | CCA       | 71  | Male   | White | 8/22/2017       | Brush       | Liver                                 | Y    | N                    | NA                    | PaTOM            | Bacterial Contamination  |
| HO3      | PDAC      | 66  | Male   | White | 9/5/2017        | FNA         | Pancreas                              | Y    | Y                    | N                     | PaTOM            | Fibroblast Contamination |
| HO5      | PDAC      | 50  | Female | White | 9/26/2017       | Core Biopsy | Liver                                 | Y    | Y                    | N                     | PaTOM            | Poor Proliferation       |
| HO7      | PDAC      | 60  | Male   | White | 10/24/2017      | Core Biopsy | Liver                                 | Y    | Y                    | N                     | PaTOM            | Poor Proliferation       |
| HO8      | PDAC      | 36  | Female | White | 10/26/2017      | Core Biopsy | Liver                                 | Y    | N                    | N                     | PaTOM            | Poor Proliferation       |
| HO9      | PDAC      | 72  | Female | White | 10/27/2017      | FNA         | Pancreas                              | Y    | Y                    | N                     | PaTOM            | Fibroblast Contamination |
| HO10     | PDAC      | 64  | Female | White | 11/7/2017       | FNA         | Pancreas                              | Y    | Y                    | Y                     | PaTOM            |                          |
| HO11     | PDAC      | 71  | Male   | White | 11/9/2017       | Core Biopsy | Liver                                 | N    | NA                   | NA                    | PaTOM            | Low Cellularity          |
| HO12     | CRC       | 54  | Male   | White | 11/17/2017      | Core Biopsy | Liver                                 | Y    | Y                    | Y                     | PaTOM            |                          |
| HO13     | PDAC      | 77  | Female | White | 11/21/2017      | Resection   | Pancreas                              | Y    | N                    | NA                    | PaTOM            | Poor Proliferation       |
| HO14     | PDAC      | 62  | Male   | White | 11/22/2017      | Resection   | Pancreas                              | Y    | Y                    | N                     | PaTOM            | Poor Proliferation       |
| HO15     | PNET      | 67  | Female | White | 12/1/2017       | Resection   | Pancreas                              | N    | NA                   | NA                    | PaTOM            | Low Cellularity          |
| HO16     | PDAC      | 59  | Male   | White | 12/4/2017       | Core Biopsy | Liver                                 | N    | NA                   | NA                    | PaTOM            | Low Cellularity          |
| HO17     | CCA       | 61  | Male   | White | 12/4/2017       | Core Biopsy | Liver                                 | Y    | Y                    | Y                     | PaTOM            |                          |
| HO18     | CCA       | 56  | Male   | White | 12/7/2017       | Core Biopsy | Liver                                 | N    | NA                   | NA                    | PaTOM            | Low Cellularity          |
| HO19     | PDAC      | 74  | Male   | White | 12/20/2017      | Resection   | Pancreas                              | N    | NA                   | NA                    | PaTOM            | Fungal Contamination     |
| HO20     | CRC       | 66  | Male   | White | 12/26/2017      | Core Biopsy | Retroperitoneal Lymph Node            | Y    | Y                    | Y                     | PaTOM            |                          |
| HO21     | CRC       | 64  | Female | White | 12/29/2017      | Core Biopsy | Liver                                 | Y    | N                    | NA                    | PaTOM            | Poor Proliferation       |
| HO22     | PDAC      | 64  | Female | White | 1/2/2018        | Core Biopsy | Abdomen Soft Tissue                   | N    | NA                   | NA                    | PaTOM            | Low Cellularity          |
| HO23     | PDAC      | 65  | Female | White | 1/3/2018        | Resection   | Pancreas                              | N    | NA                   | NA                    | PaTOM            | Fungal Contamination     |
| HO24     | CCA       | 55  | Male   | White | 1/4/2018        | Core Biopsy | Liver                                 | N    | NA                   | NA                    | PaTOM            | Low Cellularity          |
| HO25     | PDAC      | 66  | Female | Asian | 1/9/2018        | Core Biopsy | Liver                                 | N    | NA                   | NA                    | PaTOM            | Low Cellularity          |
| HO26     | PDAC      | 70  | Female | White | 1/12/2018       | Resection   | Pancreas                              | N    | NA                   | NA                    | PaTOM            | Low Cellularity          |
| HO27     | PDAC      | 67  | Female | Asian | 1/17/2018       | FNA         | Pancreas                              | Y    | Y                    | N                     | PaTOM            | Fibroblast Contamination |
| HO28     | PDAC      | 89  | Male   | White | 1/19/2018       | FNA         | Pancreas                              | Y    | Y                    | N                     | PaTOM, WNT       | Poor Proliferation       |
| HO29     | PNET      | 51  | Male   | White | 1/22/2018       | Resection   | Pancreas                              | Y    | Y                    | Y                     | PaTOM            |                          |
| HO30     | PDAC      | 76  | Male   | White | 1/22/2018       | Resection   | Pancreas                              | N    | NA                   | NA                    | PaTOM            | Low Cellularity          |
| HO31     | PDAC      | 71  | Male   | White | 1/23/2018       | Resection   | Pancreas                              | N    | NA                   | NA                    | PaTOM            | Low Cellularity          |
| HO32     | PDAC      | 76  | Female | White | 1/25/2018       | Resection   | Pancreas                              | N    | NA                   | NA                    | PaTOM            | Fungal Contamination     |
| HO33     | PDAC      | 78  | Male   | White | 1/25/2018       | Resection   | Pancreas                              | N    | NA                   | NA                    | PaTOM            | Low Cellularity          |
| HO34     | PDAC      | 78  | Male   | White | 1/30/2018       | Resection   | Pancreas                              | N    | NA                   | NA                    | PaTOM            | Low Cellularity          |
| HO35     | PDAC      | 24  | Female | White | 2/2/2018        | Resection   | Pancreas                              | N    | NA                   | NA                    | PaTOM            | Low Cellularity          |
| HO36     | PDAC      | 73  | Male   | White | 2/5/2018        | Resection   | Pancreas                              | Y    | Y                    | N                     | PaTOM            | Poor Proliferation       |
| HO37     | CCA       | 73  | Female | White | 2/12/2018       | Core Biopsy | Liver                                 | N    | NA                   | NA                    | PaTOM            | Low Cellularity          |
| HO38     | PDAC      | 60  | Male   | White | 2/13/2018       | Resection   | Pancreas                              | N    | NA                   | NA                    | PaTOM            | Fungal Contamination     |
| HO39     | PDAC      | 83  | Female | White | 2/19/2018       | Resection   | Pancreas                              | Y    | N                    | NA                    | PaTOM            | Fungal Contamination     |
| HO40     | CCA       | 58  | Male   | White | 2/21/2018       | Core Biopsy | Liver                                 | N    | NA                   | NA                    | PaTOM, WNT       | Low Cellularity          |
| HO41     | PDAC      | 65  | Male   | White | 2/22/2018       | Core Biopsy | Adjacent to Gastrojejunal Anastomosis | N    | NA                   | NA                    | PaTOM, WNT       | Low Cellularity          |
| HO42     | CCA       | 66  | Male   | White | 2/23/2018       | Core Biopsy | Liver                                 | Y    | Y                    | Y                     | PaTOM, WNT       |                          |
| HO43     | PDAC      | 79  | Male   | White | 2/26/2018       | Resection   | Pancreas                              | N    | NA                   | NA                    | PaTOM            | Low Cellularity          |
| HO44     | PDAC      | 71  | Female | White | 3/13/2018       | Resection   | Pancreas                              | Y    | Y                    | Y                     | PaTOM            |                          |
| HO45     | PNET      | 72  | Male   | White | 3/14/2018       | Resection   | Pancreas                              | Y    | Y                    | N                     | PaTOM            | Fibroblast Contamination |
| HO46     | CRC       | 54  | Male   | White | 3/19/2018       | Core Biopsy | Liver                                 | Y    | Y                    | Y                     | PaTOM            |                          |
| HO47     | PDAC      | 25  | Female | White | 3/21/2018       | Resection   | Pancreas                              | N    | NA                   | NA                    | PaTOM, WNT       | Low Cellularity          |
| HO48     | PNET      | 67  | Male   | White | 4/3/2018        | Resection   | Pancreas                              | Y    | Y                    | N                     | PaTOM            | Fibroblast Contamination |
| HO49     | PDAC      | 70  | Female | White | 4/4/2018        | FNA         | Pancreas                              | Y    | Y                    | N                     | PaTOM, WNT       | Poor Proliferation       |
| HO50     | PDAC      | 64  | Female | White | 4/6/2018        | Resection   | Pancreas                              | Y    | Y                    | Y                     | PaTOM            |                          |
| HO51     | PDAC      | 76  | Male   | White | 4/11/2018       | Resection   | Pancreas                              | N    | NA                   | NA                    | PaTOM            | Low Cellularity          |
| HO52     | PNET      | 57  | Male   | White | 4/13/2018       | Resection   | Pancreas                              | N    | NA                   | NA                    | PaTOM            | Low Cellularity          |
| HO53     | PNET      | 67  | Male   | White | 4/17/2018       | Resection   | Pancreas                              | N    | NA                   | NA                    | PaTOM            | Low Cellularity          |
| HO54     | PDAC      | 62  | Male   | White | 4/19/2018       | Resection   | Pancreas                              | N    | NA                   | NA                    | PaTOM            | Low Cellularity          |
| HO55     | CCA       | 62  | Male   | White | 4/26/2018       | Core Biopsy | Liver                                 | N    | NA                   | NA                    | PaTOM            | Low Cellularity          |
| HO56     | PDAC      | 69  | Female | White | 4/26/2018       | FNA         | Pancreas                              | Y    | N                    | NA                    | PaTOM, WNT       | Fibroblast Contamination |
| HO57     | CRC       | 68  | Female | White | 5/2/2018        | Core Biopsy | Liver                                 | Y    | Y                    | N                     | PaTOM            | Bacterial Contamination  |
| HO58     | PDAC      | 63  | Female | White | 5/2/2018        | Resection   | Pancreas                              | N    | NA                   | NA                    | PaTOM            | Low Cellularity          |
| HO63     | PDAC      | 70  | Male   | White | 6/6/2018        | Resection   | Pancreas                              | Y    | N                    | NA                    | PaTOM            | Poor Proliferation       |
| HO65     | CRC       | 84  | Male   | White | 6/21/2018       | Core Biopsy | Liver                                 | Y    | Y                    | N                     | PaTOM            | Bacterial Contamination  |
| HO66     | PDAC      | 51  | Male   | White | 6/22/2018       | Resection   | Pancreas                              | Y    | N                    | NA                    | PaTOM            | Bacterial Contamination  |
| HO67     | PDAC      | 72  | Female | White | 7/11/2018       | FNA         | Pancreas                              | Y    | N                    | NA                    | PaTOM            | Poor Proliferation       |
| HO69     | PDAC      | 68  | Female | White | 7/13/2018       | FNA         | Pancreas                              | Y    | Y                    | N                     | PaTOM            | Fibroblast Contamination |
| HO70     | PNET      | 82  | Male   | White | 7/16/2018       | Resection   | Pancreas                              | N    | NA                   | NA                    | PaTOM            | Low Cellularity          |
| HO71     | PDAC      | 56  | Female | White | 7/18/2018       | Core Biopsy | Liver                                 | N    | NA                   | NA                    | PaTOM            | Low Cellularity          |
| HO72     | PNET      | 61  | Male   | White | 7/24/2018       | Resection   | Pancreas                              | Y    | Y                    | N                     | PaTOM            | Poor Proliferation       |
| HO73     | PDAC      | 70  | Female | White | 7/31/2018       | FNA         | Liver                                 | N    | NA                   | NA                    | PaTOM            | Low Cellularity          |
| HO77     | CCA       | 62  | Male   | White | 8/6/2018        | Core Biopsy | Liver                                 | Y    | N                    | NA                    | PaTOM            | Poor Proliferation       |
| HO79     | PDAC      | 71  | Male   | White | 8/14/2018       | Resection   | Pancreas                              | N    | NA                   | NA                    | PaTOM            | Low Cellularity          |
| HO81     | CRC       | 59  | Male   | White | 8/20/2018       | Core Biopsy | Liver                                 | N    | NA                   | NA                    | PaTOM            | Low Cellularity          |
| HO83     | PDAC      | 76  | Male   | White | 8/23/2018       | Resection   | Pancreas                              | N    | NA                   | NA                    | PaTOM            | Fungal Contamination     |
| HO84     | PDAC      | 64  | Male   | White | 8/24/2018       | Resection   | Pancreas                              | N    | NA                   | NA                    | PaTOM            | Fungal Contamination     |
| HO86     | PDAC      | 63  | Male   | White | 8/29/2018       | FNA         | Pancreas                              | N    | NA                   | NA                    | PaTOM            | Low Cellularity          |
| HO87     | PDAC      | 64  | Female | White | 8/29/2018       | Resection   | Pancreas                              | Y    | N                    | NA                    | PaTOM            | Fungal Contamination     |
| HO90     | CRC       | 37  | Male   | White | 9/19/2018       | Core Biopsy | Liver                                 | Y    | Y                    | Y                     | PaTOM            |                          |
| HO92     | CCA       | 64  | Female | White | 9/24/2018       | Core Biopsy | Liver                                 | N    | NA                   | NA                    | PaTOM            | Low Cellularity          |
| HO93     | PDAC      | 76  | Female | White | 9/25/2018       | Resection   | Pancreas                              | N    | N                    | NA                    | PaTOM            | Low Cellularity          |
| HO94     | PDAC      | 70  | Male   | White | 9/28/2018       | FNA         | Pancreas                              | Y    | N                    | NA                    | PaTOM            | Poor Proliferation       |
| HO95     | PDAC      | 79  | Male   | White | 9/28/2018       | Resection   | Pancreas                              | N    | NA                   | NA                    | PaTOM            | Low Cellularity          |
| HO96     | PDAC      | 65  | Female | White | 10/2/2018       | Resection   | Pancreas                              | N    | NA                   | NA                    | PaTOM            | Low Cellularity          |
| HO97     | PDAC      | 65  | Female | White | 10/9/2018       | Resection   | Pancreas                              | Y    | Y                    | Y                     | PaTOM            |                          |
| HO98     | CRC       | 66  | Male   | White | 11/15/2018      | Core Biopsy | Liver                                 | Y    | Y                    | Y                     | PaTOM            |                          |
| HO99     | PDAC      | 47  | Male   | White | 11/15/2018      | Core Biopsy | Liver                                 | Y    | Y                    | N                     | PaTOM, WNT       | Poor Proliferation       |
| HO100    | PDAC      | 67  | Female | White | 11/20/2018      | Resection   | Pancreas                              | Y    | Y                    | N                     | PaTOM, WNT       | Poor Proliferation       |
| HO101    | CRC       | 56  | Female | White | 12/7/2018       | Core Biopsy | Peritoneal Lesion                     | N    | NA                   | NA                    | PaTOM            | Low Cellularity          |
| HO102    | PDAC      | 79  | Male   | White | 12/11/2018      | Resection   | Pancreas                              | N    | NA                   | NA                    | PaTOM            | Low Cellularity          |
| HO103    | PDAC      | 70  | Male   | White | 12/14/2018      | FNA         | Pancreas                              | Y    | Y                    | N                     | PaTOM, WNT       | Poor Proliferation       |

|       |             |    |        |                  |            |             |                  |   |    |    |            |                          |
|-------|-------------|----|--------|------------------|------------|-------------|------------------|---|----|----|------------|--------------------------|
| HO104 | PDAC        | 53 | Male   | White            | 12/18/2018 | Core Biopsy | Liver            | N | NA | NA | PaTOM      | Low Cellularity          |
| HO105 | CCA         | 63 | Male   | White            | 12/21/2018 | Core Biopsy | Liver            | N | NA | NA | PaTOM      | Low Cellularity          |
| HO106 | Small Bowel | 68 | Female | White            | 12/28/2018 | Core Biopsy | Liver            | Y | Y  | Y  | PaTOM      |                          |
| HO107 | PDAC        | 77 | Female | White            | 1/21/2019  | Core Biopsy | Liver            | Y | Y  | Y  | PaTOM, WNT |                          |
| HO108 | PNET        | 65 | Male   | White            | 1/23/2019  | Resection   | Pancreas         | N | NA | NA | PaTOM      | Poor Proliferation       |
| HO110 | PDAC        | 70 | Female | White            | 2/8/2019   | Core Biopsy | Liver            | Y | N  | NA | PaTOM      | Low Cellularity          |
| HO111 | PDAC        | 78 | Female | White            | 3/4/2019   | Resection   | Pancreas         | N | NA | NA | PaTOM      | Low Cellularity          |
| HO112 | PDAC        | 70 | Female | White            | 3/5/2019   | Resection   | Pancreas         | N | NA | NA | PaTOM      | Fungal Contamination     |
| HO113 | PDAC        | 58 | Male   | White            | 3/6/2019   | Resection   | Pancreas         | Y | Y  | Y  | PaTOM, WNT |                          |
| HO114 | PDAC        | 87 | Female | White            | 3/8/2019   | Resection   | Pancreas         | N | NA | NA | PaTOM      | Fungal Contamination     |
| HO115 | CCA         | 61 | Female | White            | 4/1/2019   | Core biopsy | Liver            | N | NA | NA | PaTOM      | Low Cellularity          |
| HO116 | PNET        | 67 | Male   | White            | 4/8/2019   | Resection   | Pancreas         | Y | Y  | Y  | PaTOM, WNT |                          |
| HO117 | CCA         | 58 | Female | White            | 4/18/2019  | Core Biopsy | Liver            | N | NA | NA | PaTOM      | Low Cellularity          |
| HO118 | PNET        | 71 | Male   | White            | 4/22/2019  | Resection   | Pancreas         | N | NA | NA | PaTOM      | Fungal Contamination     |
| HO119 | PDAC        | 75 | Male   | Asian            | 4/22/2019  | Resection   | Pancreas         | N | NA | NA | PaTOM      | Fungal Contamination     |
| HO120 | PDAC        | 59 | Male   | White            | 4/25/2019  | FNA         | Pancreas         | Y | N  | NA | PaTOM, WNT | Low Cellularity          |
| HO121 | PDAC        | 71 | Female | White            | 4/30/2019  | Resection   | Pancreas         | N | NA | NA | PaTOM, WNT | Poor Proliferation       |
| HO122 | PDAC        | 55 | Female | White            | 5/1/2019   | Resection   | Pancreas         | N | NA | NA | PaTOM, WNT | Low Cellularity          |
| HO123 | CRC         | 64 | Male   | White            | 5/3/2019   | Core Biopsy | Liver            | Y | Y  | Y  | PaTOM      |                          |
| HO124 | PDAC        | 87 | Female | White            | 5/8/2019   | Resection   | Pancreas         | Y | N  | NA | WNT        | Poor Proliferation       |
| HO126 | CRC         | 55 | Female | White            | 5/20/2019  | Core Biopsy | Liver            | N | NA | NA | PaTOM      | Poor Proliferation       |
| HO127 | CRC         | 44 | Female | White            | 5/22/2019  | Core Biopsy | Liver            | Y | Y  | Y  | PaTOM      |                          |
| HO128 | CCA         | 76 | Male   | White            | 5/30/2019  | Core Biopsy | Liver            | Y | N  | NA | PaTOM, WNT | Low Cellularity          |
| HO129 | PNET        | 73 | Female | White            | 6/5/2019   | Resection   | Pancreas         | Y | Y  | Y  | WNT        |                          |
| HO130 | ACC         | 58 | Male   | White            | 6/10/2019  | Core Biopsy | Liver            | Y | Y  | Y  | WNT        |                          |
| HO131 | CCA         | 50 | Female | White            | 6/17/2019  | Core Biopsy | Liver            | Y | Y  | Y  | WNT        |                          |
| HO132 | CCA         | 59 | Male   | White            | 6/17/2019  | Core Biopsy | Liver            | Y | N  | NA | WNT        | Poor Proliferation       |
| HO133 | PDAC        | 67 | Male   | White            | 6/18/2019  | Resection   | Pancreas         | Y | Y  | Y  | WNT        |                          |
| HO134 | PNET        | 37 | Female | White            | 6/24/2019  | Resection   | Pancreas         | Y | Y  | Y  | WNT        |                          |
| HO135 | PDAC        | 72 | Female | White            | 6/24/2019  | FNA         | Pancreas         | Y | Y  | Y  | PaTOM, WNT |                          |
| HO136 | CRC         | 66 | Male   | White            | 7/5/2019   | Core Biopsy | Liver            | N | NA | NA | WNT        | Poor Proliferation       |
| HO137 | ACC         | 47 | Female | White            | 7/11/2019  | Core Biopsy | Liver            | Y | Y  | Y  | WNT        |                          |
| HO138 | PDAC        | 62 | Female | White            | 7/18/2019  | Resection   | Pancreas         | N | NA | NA | WNT        | Low Cellularity          |
| HO139 | CCA         | 42 | Male   | White            | 7/18/2019  | Core Biopsy | Liver            | N | NA | NA | WNT        | Low Cellularity          |
| HO140 | CRC         | 29 | Male   | Asian            | 7/23/2019  | Core Biopsy | Liver            | Y | Y  | Y  | PaTOM      |                          |
| HO141 | PDAC        | 60 | Male   | White            | 7/26/2019  | Core Biopsy | Pancreas         | N | NA | NA | WNT        | Low Cellularity          |
| HO142 | PDAC        | 66 | Female | White            | 7/26/2019  | Resection   | Pancreas         | Y | Y  | Y  | WNT        |                          |
| HO143 | PDAC        | 66 | Female | White            | 7/29/2019  | Core Biopsy | Liver            | Y | N  | NA | WNT        | Poor Proliferation       |
| HO144 | CCA         | 45 | Male   | White            | 7/30/2019  | Core Biopsy | Liver            | N | NA | NA | WNT        | Low Cellularity          |
| HO145 | PDAC        | 65 | Female | White            | 7/31/2019  | Core Biopsy | Liver            | Y | Y  | Y  | WNT        |                          |
| HO146 | PDAC        | 41 | Male   | White            | 8/1/2019   | Core Biopsy | Liver            | N | NA | NA | WNT        | Low Cellularity          |
| HO147 | CCA         | 78 | Male   | White            | 8/7/2019   | Core Biopsy | Abdominal Muscle | N | NA | NA | WNT        | Low Cellularity          |
| HO148 | CCA         | 77 | Male   | White            | 8/7/2019   | Core Biopsy | Liver            | N | NA | NA | WNT        | Low Cellularity          |
| HO149 | PDAC        | 64 | Male   | White            | 8/9/2019   | Resection   | Pancreas         | N | NA | NA | WNT        | Low Cellularity          |
| HO150 | PDAC        | 78 | Male   | White            | 8/13/2019  | Resection   | Pancreas         | N | NA | NA | WNT        | Low Cellularity          |
| HO151 | PDAC        | 83 | Male   | White            | 8/15/2019  | FNA         | Pancreas         | N | NA | NA | WNT        | Low Cellularity          |
| HO152 | PDAC        | 53 | Male   | White            | 8/20/2019  | Resection   | Pancreas         | N | NA | NA | WNT        | Low Cellularity          |
| HO153 | PDAC        | 74 | Male   | White            | 8/27/2019  | Resection   | Pancreas         | Y | Y  | Y  | WNT        |                          |
| HO154 | PDAC        | 71 | Female | White            | 8/27/2019  | Resection   | Pancreas         | Y | Y  | Y  | WNT        |                          |
| HO155 | PDAC        | 57 | Female | White            | 8/30/2019  | Resection   | Pancreas         | N | NA | NA | WNT        | Low Cellularity          |
| HO156 | PDAC        | 67 | Female | White            | 9/4/2019   | Resection   | Pancreas         | N | NA | NA | WNT        | Low Cellularity          |
| HO157 | PDAC        | 71 | Male   | White            | 9/6/2019   | Resection   | Pancreas         | N | NA | NA | WNT        | Low Cellularity          |
| HO165 | PDAC        | 66 | Male   | White            | 10/8/2019  | Core Biopsy | Liver            | Y | Y  | Y  | WNT        |                          |
| HO166 | CCA         | 61 | Male   | White            | 10/28/2019 | Core Biopsy | Liver            | N | NA | NA | WNT        | Low Cellularity          |
| HO167 | CCA         | 73 | Female | White            | 10/28/2019 | Core Biopsy | Liver            | N | NA | NA | WNT        | Low Cellularity          |
| HO169 | CCA         | 50 | Female | White            | 12/5/2019  | Core Biopsy | Liver            | Y | Y  | N  | WNT        | Fibroblast Contamination |
| HO170 | CCA         | 61 | Male   | White            | 12/5/2019  | Core Biopsy | Liver            | Y | Y  | Y  | WNT        |                          |
| HO171 | CCA         | 69 | Female | White            | 12/16/2019 | Core Biopsy | Liver            | Y | Y  | Y  | WNT        |                          |
| HO172 | PDAC        | 70 | Female | White            | 12/16/2019 | Resection   | Pancreas         | Y | Y  | N  | WNT        | Fibroblast Contamination |
| HO173 | PDAC        | 66 | Male   | White            | 12/26/2019 | Core Biopsy | Liver            | N | NA | NA | WNT        | Low Cellularity          |
| HO181 | CCA         | 72 | Male   | White            | 1/8/2020   | Core Biopsy | Liver            | Y | Y  | N  | WNT        | Poor Proliferation       |
| HO182 | CCA         | 71 | Male   | White            | 1/15/2020  | Core Biopsy | Liver            | N | NA | NA | WNT        | Low Cellularity          |
| HO183 | CCA         | 73 | Female | White            | 1/15/2020  | Core Biopsy | Liver            | N | NA | NA | WNT        | Low Cellularity          |
| HO184 | CCA         | 58 | Female | White            | 1/31/2020  | Core Biopsy | Liver            | Y | Y  | N  | WNT        | Bacterial Contamination  |
| HO185 | CCA         | 55 | Female | White            | 2/6/2020   | Core Biopsy | Liver            | Y | Y  | N  | WNT        | Poor Proliferation       |
| HO186 | CCA         | 72 | Male   | White            | 2/12/2020  | Core Biopsy | Liver            | Y | Y  | N  | WNT        | Bacterial Contamination  |
| HO187 | CCA         | 61 | Female | White            | 2/13/2020  | Core Biopsy | Liver            | Y | Y  | N  | WNT        | Fibroblast Contamination |
| HO190 | PDAC        | 67 | Female | White            | 2/27/2020  | Core Biopsy | Liver            | Y | Y  | Y  | WNT        |                          |
| HO191 | CCA         | 79 | Male   | White            | 2/27/2020  | Core Biopsy | Liver            | Y | N  | N  | WNT        | Fibroblast Contamination |
| HO192 | PDAC        | 64 | Female | White            | 3/3/2020   | Core Biopsy | Liver            | N | NA | NA | WNT        | Low Cellularity          |
| HO193 | CCA         | 81 | Female | White            | 3/11/2020  | Core Biopsy | Liver            | Y | Y  | Y  | WNT        |                          |
| HO213 | CCA         | 77 | Male   | White            | 7/23/2020  | Core biopsy | Liver            | Y | N  | NA | WNT        | Poor Proliferation       |
| HO214 | CCA         | 49 | Female | White            | 8/6/2020   | Core Biopsy | Liver            | N | N  | NA | WNT        | Poor Proliferation       |
| HO215 | CCA         | 56 | Female | White            | 8/20/2020  | Core Biopsy | Liver            | N | N  | N  | WNT        | Poor Proliferation       |
| HO216 | CCA         | 81 | Male   | White            | 9/3/2020   | Core Biopsy | Liver            | N | N  | N  | WNT        | Poor Proliferation       |
| HO220 | CCA         | 71 | Female | African American | 10/21/2020 | Core Biopsy | Liver            | Y | N  | N  | WNT        | Poor Proliferation       |
| HO230 | CCA         | 71 | Male   | White            | 11/10/2020 | Core Biopsy | Liver            | Y | Y  | N  | WNT        | Poor Proliferation       |
| HO232 | PDAC        | 67 | Male   | White            | 1/21/2021  | Core Biopsy | Pancreas         | Y | Y  | Y  | WNT        |                          |

**Supplemental Table 2. List of all donor patient PDO information for the study.** Information includes lab organoid ID, diagnosis, age, sex, race, PDO initiation date, sample type, sample location, PDO initiation success summary, culture media, and reason for PDO failure (if applicable). Demographic options and classifications were made by the investigators.

| PDO ID | Source     | Diagnosis   | Tumor Stage | Sample Type         | Media     | IF               | Donor Tumor Sequence | PDO DNA-Seq    | RNA-Seq                                  | CGH (CNV) |
|--------|------------|-------------|-------------|---------------------|-----------|------------------|----------------------|----------------|------------------------------------------|-----------|
| HO12   | Mayo IRB   | CRC         | 4           | Biopsy (liver)      | PaTOM     | CK19, CDH1       | Tempus               | Onco-Seq Panel | NA                                       | P1, P5    |
| HO17*  | Mayo IRB   | CCA         | 4           | Biopsy (liver)      | PaTOM     | CK19, SOX9       | Tempus               | Onco-Seq Panel | NA                                       | P8, P30   |
| HO20*  | Mayo IRB   | CRC         | 4           | Biopsy (lymph node) | PaTOM     | CK19, CDH1, MUC2 | Tempus               | Onco-Seq Panel | NA                                       | P3, P10   |
| HO29   | Mayo IRB   | PNET        | 2           | Resection           | PaTOM     | Syn, Chrom       | NA                   | Onco-Seq Panel | NA                                       | NA        |
| HO42*  | Mayo IRB   | CCA         | 4           | Biopsy (liver)      | PaTOM     | NA               | NA                   | QIaseq Panel   | NA                                       | NA        |
| HO44   | Mayo IRB   | PDAC        | 2           | Resection           | PaTOM WNT | CK19, CDH1, SOX9 | NA                   | Onco-Seq Panel | WNT P15,P16,P17<br>PaTOM P16,P17,P25     | NA        |
| HO46*  | Mayo IRB   | CRC         | 4           | Biopsy (liver)      | PaTOM     | NA               | Tempus               | QIaseq Panel   | NA                                       | NA        |
| HO90*  | Mayo IRB   | CRC         | 4           | Biopsy (liver)      | PaTOM     | NA               | Tempus               | Onco-Seq Panel | NA                                       | NA        |
| HO98*  | Mayo IRB   | CRC         | 4           | Biopsy (liver)      | PaTOM     | NA               | Tempus               | Onco-Seq Panel | NA                                       | P1, P19   |
| HO106* | Mayo IRB   | Small Bowel | 4           | Biopsy (liver)      | PaTOM     | NA               | Tempus               | Onco-Seq Panel | NA                                       | NA        |
| HO107* | Mayo IRB   | PDAC        | 4           | Biopsy (liver)      | PaTOM WNT | NA               | Tempus               | QIaseq Panel   | WNT P12,P13<br>PaTOM P10,P17             | NA        |
| HO123* | Mayo IRB   | CRC         | 4           | Biopsy (liver)      | PaTOM     | NA               | Tempus               | QIaseq Panel   | NA                                       | NA        |
| HO127* | Mayo IRB   | CRC         | 4           | Biopsy (liver)      | PaTOM     | NA               | Tempus               | QIaseq Panel   | NA                                       | NA        |
| HO133  | Mayo IRB   | PDAC        | 2           | Resection           | WNT       | NA               | NA                   | QIaseq Panel   | NA                                       | NA        |
| HO140* | Mayo IRB   | CRC         | 4           | Biopsy (liver)      | PaTOM     | NA               | Tempus               | QIaseq Panel   | NA                                       | NA        |
| HO145  | Mayo IRB   | PDAC        | 4           | Biopsy (liver)      | WNT       | NA               | NA                   | QIaseq Panel   | NA                                       | NA        |
| HO153  | Mayo IRB   | PDAC        | 2           | Resection           | WNT       | NA               | NA                   | QIaseq Panel   | NA                                       | NA        |
| HO159  | France IRB | PDAC        | 1/2         | PDX Tumor           | WNT       | NA               | NA                   | QIaseq Panel   | NA                                       | NA        |
| HO160  | France IRB | PDAC        | 1/2         | PDX Tumor           | WNT       | NA               | NA                   | QIaseq Panel   | NA                                       | NA        |
| HO161  | France IRB | PDAC        | 1/2         | PDX Tumor           | WNT       | NA               | NA                   | QIaseq Panel   | NA                                       | NA        |
| HO162  | Mayo IRB   | PDAC        | 4           | PDX Tumor           | PaTOM     | NA               | NA                   | NA             | NA                                       | NA        |
| HO163  | Mayo IRB   | PDAC        | 4           | PDX Tumor           | PaTOM WNT | NA               | NA                   | NA             | WNT P6,P7,P8,P12<br>PaTOM P6,P7,P8,P12   | NA        |
| HO165  | Mayo IRB   | PDAC        | 4           | Biopsy (liver)      | WNT       | NA               | NA                   | QIaseq Panel   | NA                                       | NA        |
| HO219  | Mayo IRB   | PDAC        | 2           | PDX Tumor           | PaTOM WNT | NA               | NA                   | NA             | WNT P18,P19,P20<br>PaTOM P18,P19,P20     | NA        |
| HO222  | Mayo IRB   | PDAC        | 2           | PDX Tumor           | PaTOM     | NA               | NA                   | NA             | NA                                       | NA        |
| HO227  | Mayo IRB   | PDAC        | 2           | PDX Tumor           | PaTOM     | NA               | NA                   | NA             | NA                                       | NA        |
| HO228  | Mayo IRB   | PDAC        | 2           | PDX Tumor           | PaTOM WNT | NA               | NA                   | NA             | WNT P21,P22,P23<br>PaTOM P21,P22,P23,P24 | NA        |
| HO231  | Mayo IRB   | PDAC        | 2           | PDX Tumor           | PaTOM     | NA               | NA                   | NA             | NA                                       | NA        |

**Supplemental Table 3. Information for all PDOs in the study.** Information includes PDO lab ID, the institution from which the tissue for the PDO was obtained (source), diagnosis of the donor patient, stage of the tumor at the time of specimen collection, sample type, media in which the PDO was grown, markers detected using IF in PDOs, specimens with donor tumor sequence available (for mutation comparison to corresponding PDO) from the Tempus Targeted sequencing panel, and PDOs in which we performed DNA-seq, RNA seq- and comparative genomic hybridization (CGH) for CNV analysis. PDOs with an asterisk next to their number were utilized for our clinical correlation studies in Figure 5. Syn = Synaptophysin, Chrom = Chromogranin, P=Passage number, NA = Not Available (not performed).

**Supplemental Table 4 (Excel File).** GSEA Hallmark Gene sets enriched in HO107 and HO44 in PaTOM.

**Supplemental Table 5 (Excel File).** GSEA Hallmark and KEGG Gene sets enriched in WNT and PaTOM.

| PDO ID | Patient Diagnosis  | Lines Pre-Sample | Patient Treatment History Pre-Sample                                                                                                                                                         | Biopsy Date | Patient Treatment History Post-Sample                                                                                                                                                                                                                                                                                          | CT Scans Dates         | Patient Treatment Evaluated | Patient Response | Organoid Treatment               | Organoid Response                      | Overall Correlation | IC <sub>50</sub> References                                                                                                          |
|--------|--------------------|------------------|----------------------------------------------------------------------------------------------------------------------------------------------------------------------------------------------|-------------|--------------------------------------------------------------------------------------------------------------------------------------------------------------------------------------------------------------------------------------------------------------------------------------------------------------------------------|------------------------|-----------------------------|------------------|----------------------------------|----------------------------------------|---------------------|--------------------------------------------------------------------------------------------------------------------------------------|
| HO17   | CCA                | 3                | (1) FOLFIRINOX w/ SD, (2) Gem+Nab+Paclitaxel w/ PD, (3) Pembro w/ PD                                                                                                                         | 12/4/2017   | (1) (1/1/2017 to 1/15/2018) Gemcitabine + Erlotinib w/ PD.                                                                                                                                                                                                                                                                     | 11/20/17, 1/14/18      | Gemcitabine + Erlotinib     | PD               | Gemcitabine                      | Resistant (IC <sub>50</sub> = 15.6 nM) | MATCH               | IC <sub>50</sub> greater than 10 nM associated with Resistance [1]. IC <sub>50</sub> less than 5 nM associated with Sensitivity [2]. |
| HO42   | CCA                | 2                | (1) Cisplatin+Gemcitabine w/ PD, (2) FOLFOX x4 w/ PD                                                                                                                                         | 2/23/2018   | (1) (2/22/2018 to 3/2018) Clinical trial with TAS-102, complicated by anemia and biliary obstruction w/ PD.                                                                                                                                                                                                                    | 2/20/18, 3/15/18 (MRI) | TAS-102                     | PD               | TAS-102                          | Sensitive (IC <sub>50</sub> = 303 nM)  | MISMATCH            | IC <sub>50</sub> greater than 1 µM is associated with Resistance [4].                                                                |
| HO107  | PDAC               | 4                | (1) Neoadjuvant Gemcitabine/Abiraxane w/ PR, (2) FOLFIRINOX x 1 dose, then 5-FU/liposomal irinotecan (PD), (3) Gemcitabine / Abiraxane / Cisplatin w/ PD, (4) (10/2018-11/2018) FOLFOX w/ PD | 1/21/2019   | None                                                                                                                                                                                                                                                                                                                           | 10/25/2018, 11/26/2018 | FOLFOX                      | PD               | 5-FU<br>Oxaliplatin              | Resistant<br>Intermediate              | MATCH               | NA                                                                                                                                   |
| HO20   | CRC                | 3                | (1) FOLFOX x12, (2) FOLFIRI+Bev w/ PD, (3) FOLFIRI+Panitumumab w/ PD                                                                                                                         | 12/26/2017  | (1) (1/2018 to 7/2018) BACCI trial (Atezolizumab, Capecitabine, and Avastin versus Placebo plus Capecitabine and Avastin: blinded) w/ PD, (2) (8/2018) Clinical Trial MK-4280 trial with anti-LAG3 and Pembrolizumab. Discontinued after 1 dose, (3) (9/2018 to 2/2019) Vemurafenib + Panitumumab w/ PR in adrenal metastases. | 8/24/2018, 11/12/2018  | Vemurafenib + Panitumumab   | PR               | Vemurafenib                      | Sensitive                              | MATCH               | NA                                                                                                                                   |
| HO46   | CRC                | 4                | (1) Neoadjuvant FOLFOX+Bev w/ PR (2) Adjuvant Capecitabine w/ PD (3) FOLFIRI+Bev w/ PR, (4) 5-FU+Bev w/ SD, (4) FOLFIRI+Bev w/ PD                                                            | 3/19/2018   | (1) (4/18/2018 to 6/20/2018) Clinical trial with avelumab + eFT508 w/ PD                                                                                                                                                                                                                                                       | 4/17/18, 6/20/18       | eFT508 + avelumab           | PD               | eft508                           | Resistant                              | MATCH               | NA                                                                                                                                   |
| HO98   | CRC                | 4                | (1) FOLFOX+Bev w/ PR, (2) FOLFIRI+Celuximab w/ PD, (3) TAS-102 w/ PD (4) Regorafenib w/ PD                                                                                                   | 11/15/2018  | (1) (3/4/2019 to 4/29/2019) Clinical trial with CBT-101-01 Bozitinib w/ PD                                                                                                                                                                                                                                                     | 2/12/19, 4/29/19       | Bozitinib                   | PD               | Bozitinib                        | Resistant                              | MATCH               | NA                                                                                                                                   |
| HO90   | CRC                | 0                | None                                                                                                                                                                                         | 9/19/2018   | (1) (10/4/2018 to 11/7/2018) Regorafenib w/ SD.                                                                                                                                                                                                                                                                                | 10/6/2018, 11/26/2018  | Regorafenib                 | SD               | Regorafenib                      | Intermediate                           | MATCH               | NA                                                                                                                                   |
| HO123  | CRC                | 4                | (1) FOLFOX w/ PD, (2) FOLFIRI+Bev w/ PD, (3) TAS-102 w/ PD (4) (11/2018 to 1/2019) Regorafenib w/ PD                                                                                         | 5/3/2019    | (1) (5/6/2019) Clinical trial with KO-ERK-001                                                                                                                                                                                                                                                                                  | 10/18/18, 2/1/19       | Regorafenib                 | PD               | Regorafenib                      | Resistant                              | MATCH               | NA                                                                                                                                   |
| HO127  | CRC                | 1                | (1) (1/30/19 to 5/17/19) FOLFOX+Bev w/ PD                                                                                                                                                    | 5/22/2019   | (1) (6/3/2019 to 9/25/2019) Clinical trial BMS-813160 + FOLFIRI w/ PD                                                                                                                                                                                                                                                          | 1/17/19, 4/8/19        | FOLFOX + Bevacizumab        | PD               | 5-FU<br>Oxaliplatin              | Intermediate<br>Resistant              | MATCH               | NA                                                                                                                                   |
| HO140  | CRC                | 0                | None                                                                                                                                                                                         | 7/23/2019   | (1) (8/1/2019 to 12/2019) CAPOX + Panitumumab w/ PR                                                                                                                                                                                                                                                                            | 7/16/19, 10/3/19       | CAPOX + Panitumumab         | PR               | 5-FU<br>Oxaliplatin<br>Celuximab | Resistant<br>Resistant<br>Intermediate | MISMATCH            | NA                                                                                                                                   |
| HO106  | Small Bowel Cancer | 3                | (1) FOLFIRI w/ PD, (2) FOLFOX+Bev w/ PD, (3) FOLFOX+Panitumumab w/ PD                                                                                                                        | 12/28/2018  | (1) (1/13/2019 to 2/14/2019) Paclitaxel w/ PD                                                                                                                                                                                                                                                                                  | 12/19/18, 2/28/19      | Paclitaxel                  | PD               | Paclitaxel                       | Intermediate                           | MATCH               | NA                                                                                                                                   |



**Supplemental Table 6. Extended data for donor patients and corresponding PDOs used for the clinical correlation study.** Relevant clinical information for patients included in the correlative study and their corresponding PDO, including patient treatment history and response, PDO treatment and response, and correlation. The treatment listed in **bold text** is the treatment evaluated for clinical correlation.

#### **Supplemental Method References**

1. Varamo, C., et al., *Establishment and Characterization of a New Intrahepatic Cholangiocarcinoma Cell Line Resistant to Gemcitabine*. *Cancers (Basel)*, 2019. **11**(4).
2. Tiriac, H., et al., *Organoid Profiling Identifies Common Responders to Chemotherapy in Pancreatic Cancer*. *Cancer Discov*, 2018. **8**(9): p. 1112-1129.
3. Saito, Y., et al., *Establishment of Patient-Derived Organoids and Drug Screening for Biliary Tract Carcinoma*. *Cell Rep*, 2019. **27**(4): p. 1265-1276 e4.
4. Vlachogiannis, G., et al., *Patient-derived organoids model treatment response of metastatic gastrointestinal cancers*. *Science*, 2018. **359**(6378): p. 920-926.
