# Supplementary material for: Culture media composition influences patient-derived organoid ability to predict therapeutic responses in gastrointestinal cancers
Source: JCI journal article supplement (doi:10.1172/jci.insight.158060), 2022-10-18
Supplement: sd2 [file 2]

You are being redirected.
